# Supplementary material
Source: publisher figshare collection journal article supplement (https://acs.figshare.com/ndownloader/files/12486809)
Supplement: Supplementary file 1 [file 12486809]

# Element-Selective Molecular Charge Transport Characteristics of Binuclear Copper(II)-Lanthanide(III) Complexes

*Sebastian Schmitz,<sup>a</sup> Andrew Kovalchuk,<sup>b</sup> Alejandro Martín-Rodríguez,<sup>c</sup>*

*Jan van Leusen,<sup>a</sup> Natalya V. Izarova,<sup>d</sup> Svenja D. M. Bourone,<sup>a</sup> Yong Ai,<sup>b</sup>*

*Eliseo Ruiz,<sup>c,\*</sup> Ryan C. Chiechi,<sup>b,\*</sup> Paul Kögerler<sup>a,d,\*</sup> and Kirill Yu. Monakhov<sup>a,\*</sup>*

<sup>a</sup> Institut für Anorganische Chemie, RWTH Aachen University, Landoltweg 1, 52074 Aachen, Germany. E-mails: kirill.monakhov@ac.rwth-aachen.de, paul.koegerler@ac.rwth-aachen.de

<sup>b</sup> Stratingh Institute for Chemistry & Zernike Institute for Advanced Materials, University of Groningen, Nijenborgh 4, Groningen 9747 AG, Netherlands. E-mail: r.c.chiechi@rug.nl

<sup>c</sup> Departament de Química Inorgànica i Orgànica and Institut de Química Teòrica i Computacional, Universitat de Barcelona, Diagonal 645, 08028 Barcelona, Spain. E-mail: eliseo.ruiz@qi.ub.edu

<sup>d</sup> Jülich-Aachen Research Alliance (JARA-FIT) and Peter Grünberg Institute (PGI-6), Forschungszentrum Jülich, 52425 Jülich, Germany.

## Contents

1. Synthesis and characterization of compound **6**
2. Analytical data of HL·SMe
3. IR spectra of compounds **1–5** and IRRAS spectra of compound **2**
4. Crystal data and structure refinement details for compounds **1–6** and HL·SMe
5. A comparative analysis of structural data between compounds **1–5** and related complexes described in the literature
6. Measured ESI-MS spectra of compounds **1–5**
7. Calculated isotopic pattern of compounds **1–5**
8. TGA curves of compounds **1–5**
9. Details of large-area transport measurements
10. References

## 1. Synthesis and characterization of compound 6

### Method a:

HL·SMe (0.137 g, 0.50 mmol) was dissolved in 10 mL of methanol, and triethylamine (0.08 mL, 0.58 mmol) was added. The mixture was stirred at 80 °C for 10 min, followed by the addition of  $\text{CuX}_2 \cdot n\text{H}_2\text{O}$  (here:  $[\text{Cu}_2(\text{OOCMe})_4(\text{H}_2\text{O})_2]$ ; 0.10 g, 0.25 mmol) which immediately resulted in a color change from orange to dark brown. The resulting solution was stirred under reflux conditions for one hour. Dark-brown single crystals of  $[\text{Cu}(\text{L} \cdot \text{SMe})_2]$  (compound **6**) were obtained after one day; they were washed with a small amount of ice-cold methanol and dried in air.

### Method b:

$\text{Cu}(\text{hfa})_2 \cdot x\text{H}_2\text{O}$  (hfa = hexafluoroacetylacetonate) (0.124 g, 0.25 mmol; for  $x = 1$ ),  $\text{Dy}(\text{acac})_3 \cdot x\text{H}_2\text{O}$  (acac = acetylacetonate) (0.119 g, 0.25 mmol; for  $x = 1$ ) and the Schiff base ligand HL·SMe (0.137 g, 0.50 mmol) were dissolved together in 10 mL of methanol, and triethylamine (0.08 mL, 0.58 mmol) was added. The mixture was stirred under reflux conditions for one hour. Dark-brown single crystals of compound **6** were obtained after one day; they were washed with a small amount of ice-cold methanol and dried in air.

Elemental analysis, calcd. for  $\text{C}_{30}\text{H}_{28}\text{CuN}_2\text{O}_4\text{S}_2$  (608.20 g mol<sup>-1</sup>): C, 59.24; H, 4.64 and N, 4.61 %. Found: C, 59.15; H, 4.54 and N, 4.48 %.

IR:  $\tilde{\nu}_{\text{max}}$ (KBr pellet) / cm<sup>-1</sup>: 3429 (w, br), 3046 (w), 2999 (w), 2915 (w), 2833 (w), 1600 (vs), 1581 (sh), 1541 (s), 1489 (m), 1464 (sh), 1439 (s), 1377 (m), 1355 (w), 1330 (m), 1249 (s), 1239 (sh), 1191 (vs), 1180 (sh), 1105 (m), 1077 (m), 1013 (m), 984 (m), 870 (w), 855 (m), 827 (m), 782 (w), 739 (s), 729 (sh), 715 (sh), 612 (vw), 586 (m), 526 (w), 488 (w), 441 (m).

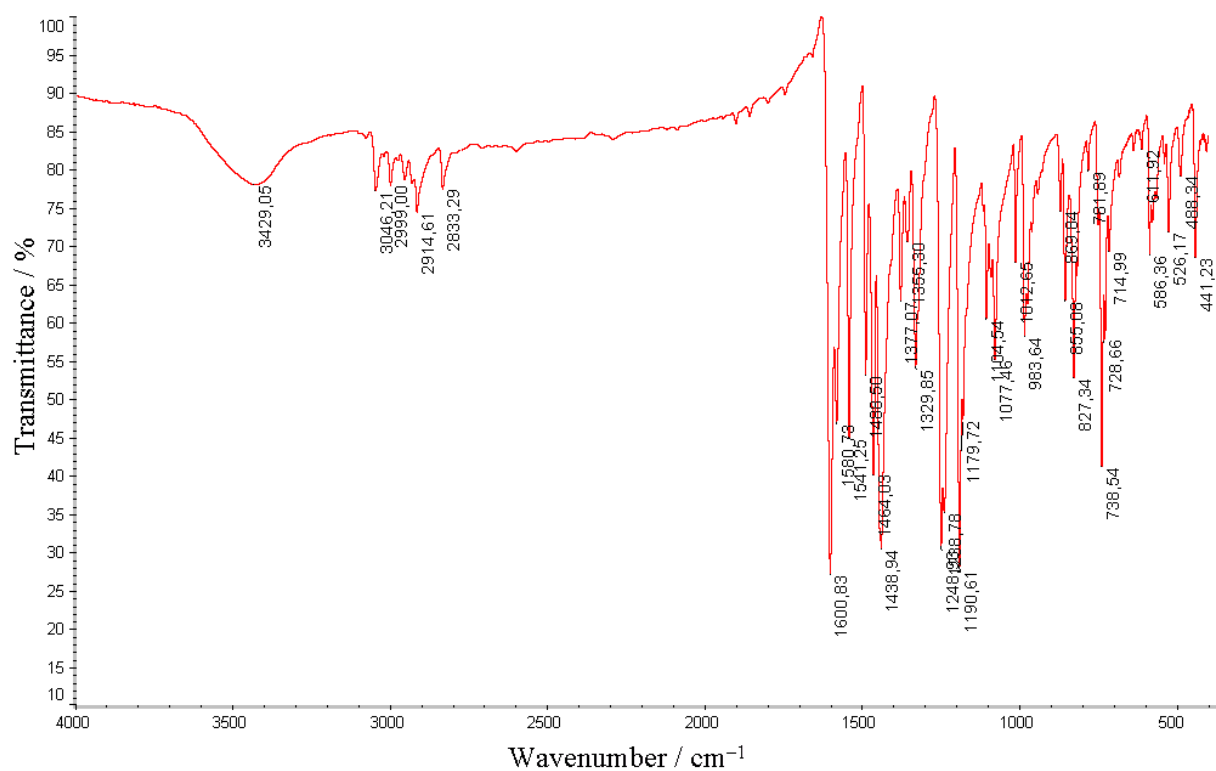

**Fig. S1** IR spectrum of compound **6** measured in the 4000–450 cm<sup>-1</sup> region, using a KBr pellet.

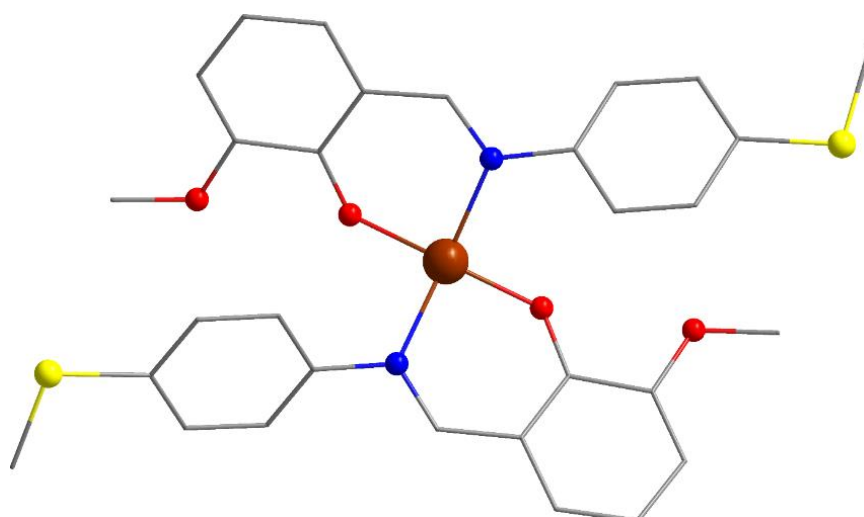

**Fig. S2** Molecular structure of compound **6**. Hydrogen atoms are omitted for clarity. Color code: C, gray; N, blue; O, red; S, yellow; Cu, brown.

The SQUID measurements of **6** yield the magnetic data shown in Fig. S3. At 290 K and 0.1 T, the  $\chi_m T$  value of  $0.42 \text{ cm}^3 \text{ K mol}^{-1}$  lies within the expected range for a single  $\text{Cu}^{2+}$  center ( $0.36\text{--}0.61 \text{ cm}^3 \text{ K mol}^{-1}$  [1]). By cooling the compound,  $\chi_m T$  slowly decreases to  $0.40 \text{ cm}^3 \text{ K mol}^{-1}$  at 25.0 K, and subsequently sharply drops to  $0.36 \text{ cm}^3 \text{ K mol}^{-1}$  at 2.0 K. Taking into account the tetragonal strongly distorted tetrahedral coordination geometry, which generates a well isolated Kramers doublet, and the small Zeeman effect generated by the applied field of 0.1 T, this distinct drop off indicates the presence of antiferromagnetic exchange interactions. The exchange interactions are of inter-molecular nature, since the shortest distance between two  $\text{Cu}^{2+}$  centers of two molecules of **6** is  $6.057 \text{ \AA}$  according to the single crystal structure, i.e. an even shorter distance between two copper centers than in **5**. The molar magnetization at 2.0 K is linear in  $B$  up to approximately 1.5 T, and reaches a value of  $0.96 N_A \mu_B$  at 5.0 T without being saturated.

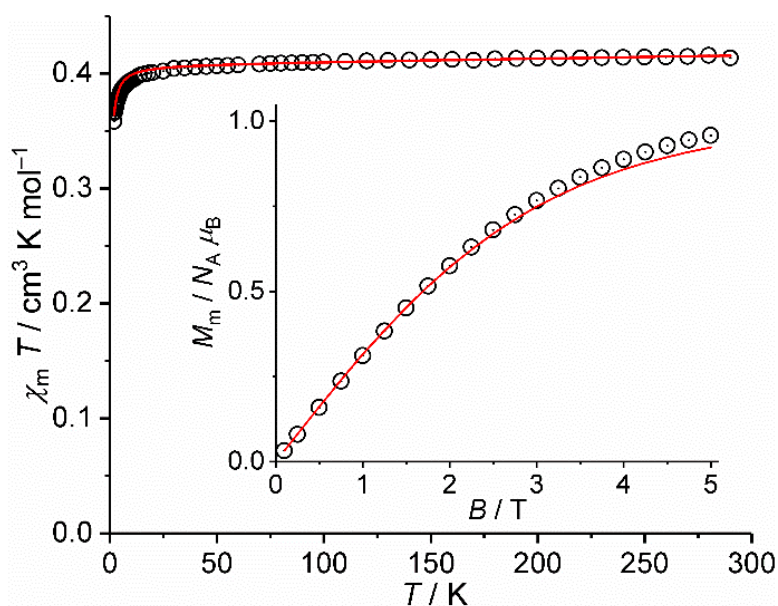

**Fig. S3** Temperature dependence of  $\chi_m T$  at 0.1 T, and field dependence of the molar magnetization  $M_m$  at 2.0 K (inset) of **6**; open symbols: experimental data; solid lines: least-squares fits.

The data are modeled employing the computational framework CONDON.<sup>[2,3]</sup> As for **5**, we assumed a ligand field symmetry of approximately  $D_{2d}$  to describe the coordination geometry of **6** as tetragonal distorted tetrahedron. The PCEM was used to generate starting values for the ligand field parameters, and the full basis of the  $3d^9$  electron configuration (10 energy states) was taken into account during the calculations. A mean-field approach was adopted to consider potential inter-molecular exchange interactions. The parameters of the least-squares fit of  $SQ = 1.4 \%$  are listed in Table S1. The ligand field parameters are related to those of **5**, yet slightly varied due to the different arrangement of the N and O ligands. The inter-molecular exchange interactions characterized by  $zJ'$  are very weak and antiferromagnetic.

**Table S1** Magnetic quantities and fit parameters of **6**: one electron spin-orbit coupling constant  $\zeta$ , Racah parameters  $B$  and  $C$ , ligand field parameters  $B^k_q$  in Wybourne notation, mean-field parameter ( $zJ'$  in “ $-2J'$ ” notation).

|                                | Cu <sup>2+</sup> ( <b>6</b> ) |
|--------------------------------|-------------------------------|
| $\zeta$ / cm <sup>-1</sup> [4] | 829                           |
| $B$ / cm <sup>-1</sup> [4]     | 1238                          |
| $C$ / cm <sup>-1</sup> [4]     | 4659                          |
| $B^2_0$ / cm <sup>-1</sup>     | $-23157 \pm 2653$             |
| $B^4_0$ / cm <sup>-1</sup>     | $21959 \pm 1474$              |
| $B^4_4$ / cm <sup>-1</sup>     | $-49709 \pm 10677$            |
| $zJ'$ / cm <sup>-1</sup>       | $-0.30 \pm 0.05$              |
| SQ                             | 1.4 %                         |

## 2. Analytical data of HL·SMe

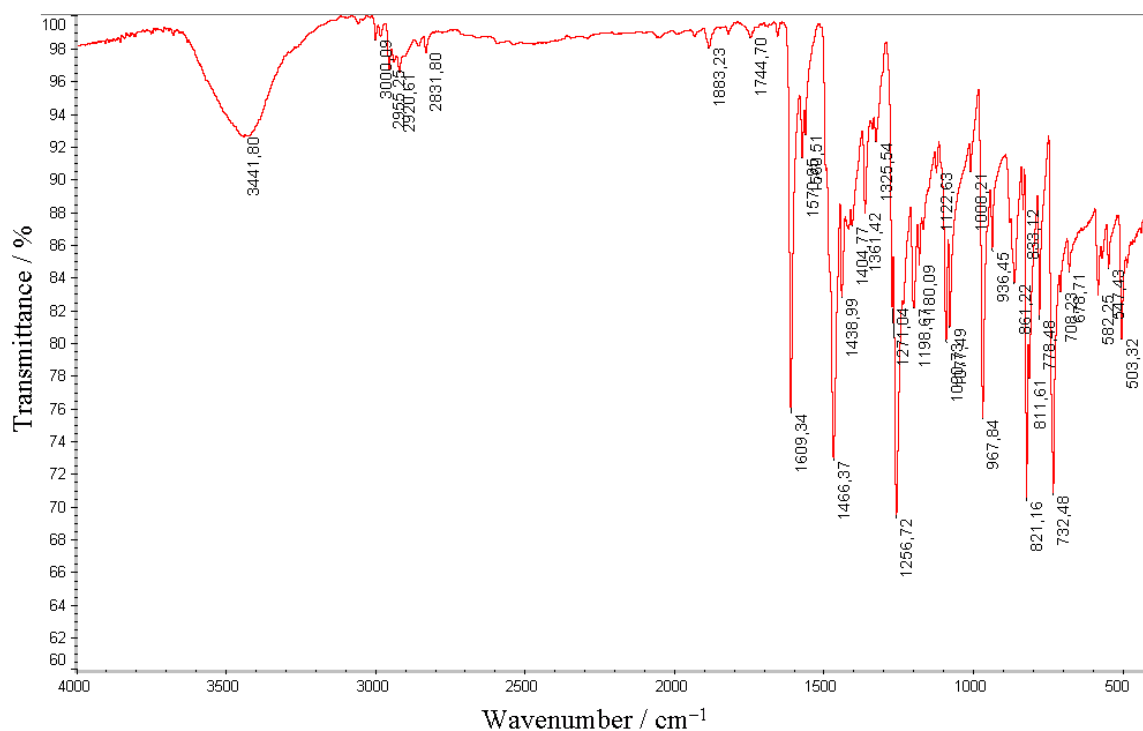

**Fig. S4** IR spectrum of HL·SMe measured in the 4000–450  $\text{cm}^{-1}$  region, using a KBr pellet.

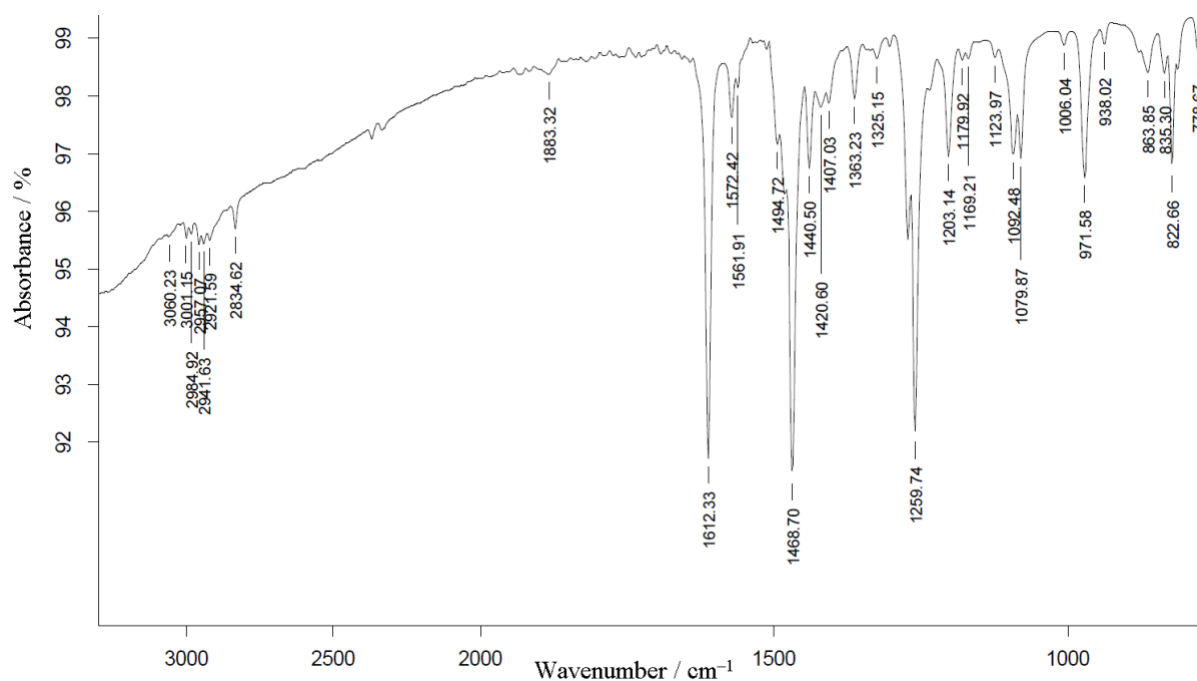

**Fig. S5** IRRAS spectrum of HL·SMe immobilized on a gold substrate from a 1.0 mmolar ethanolic solution.

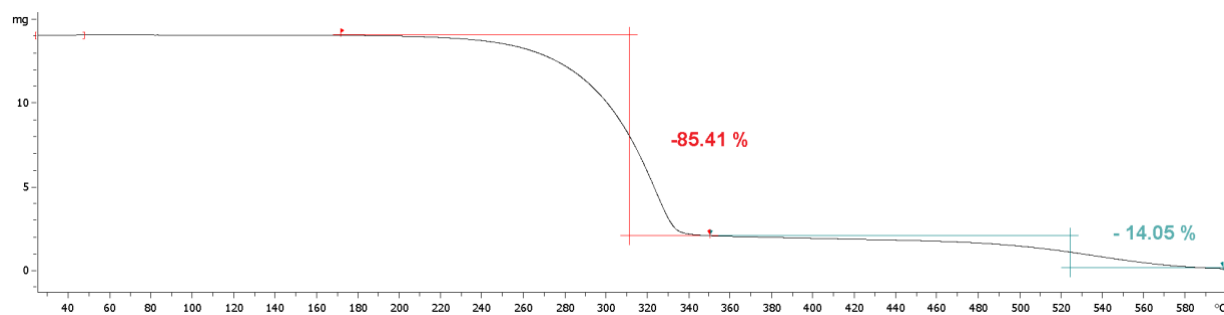

**Fig. S6** TGA curve of HL·SMe measured in dry air.

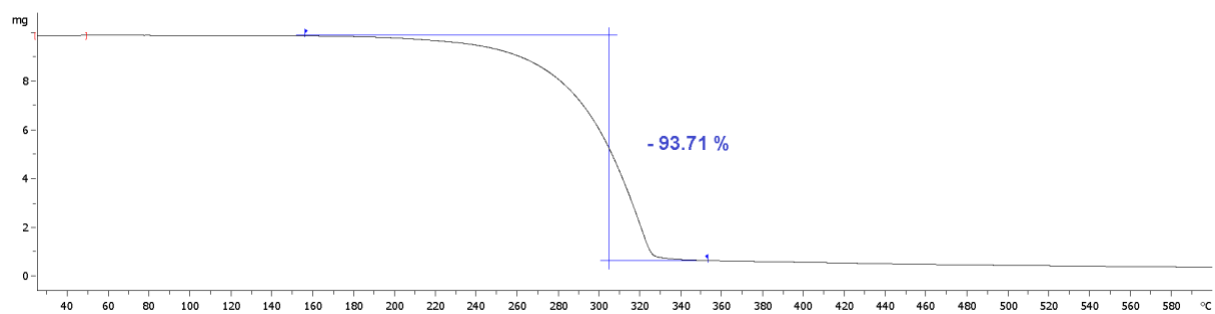

**Fig. S7** TGA curve of HL·SMe measured under nitrogen atmosphere.



### 3. IR spectra of compounds 1–5 and IRRAS spectra of compound 2

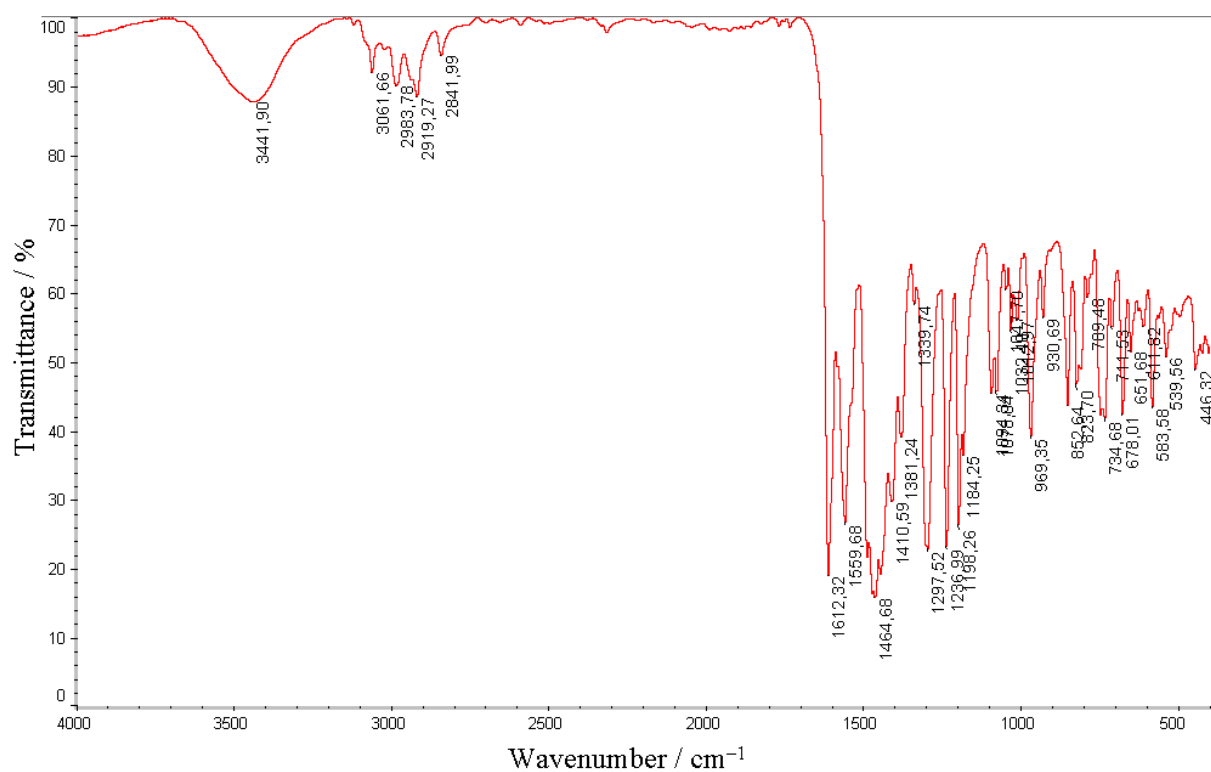

**Fig. S8** IR spectrum of compound **1** measured in the 4000–450 cm<sup>-1</sup> region, using a KBr pellet.

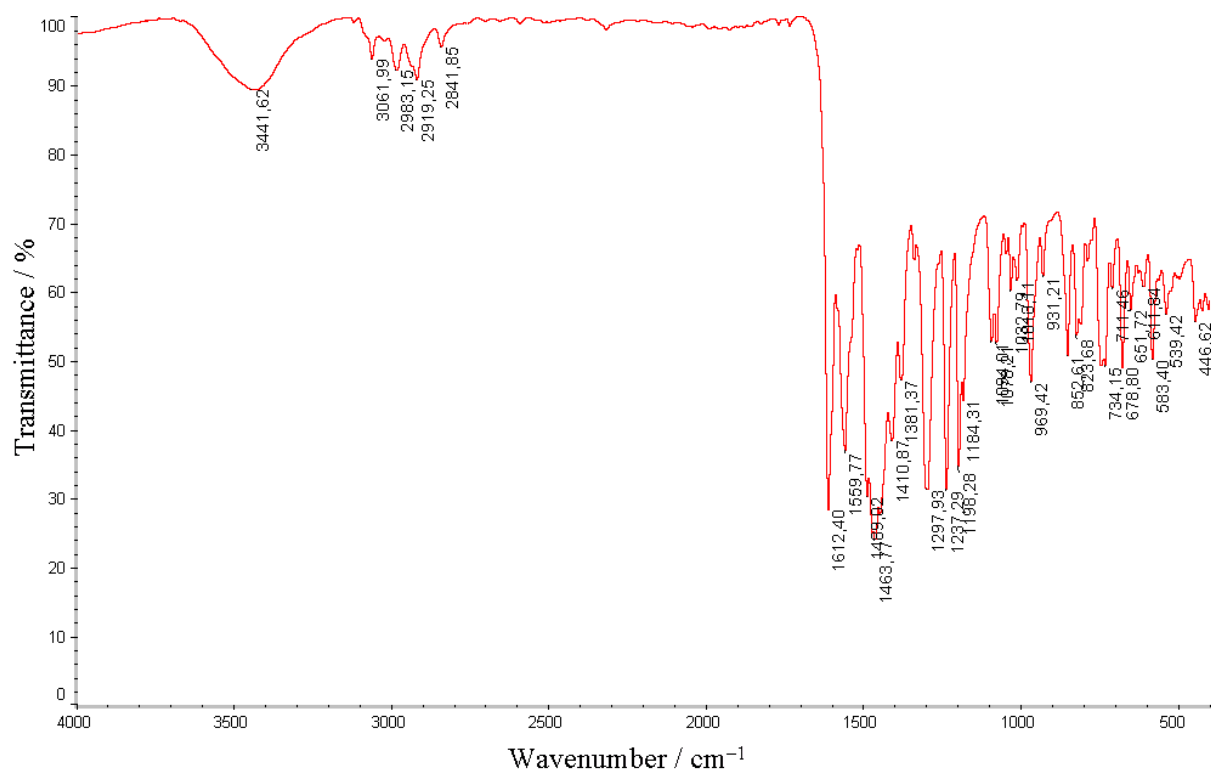

**Fig. S9** IR spectrum of compound **2** measured in the 4000–450 cm<sup>-1</sup> region, using a KBr pellet.

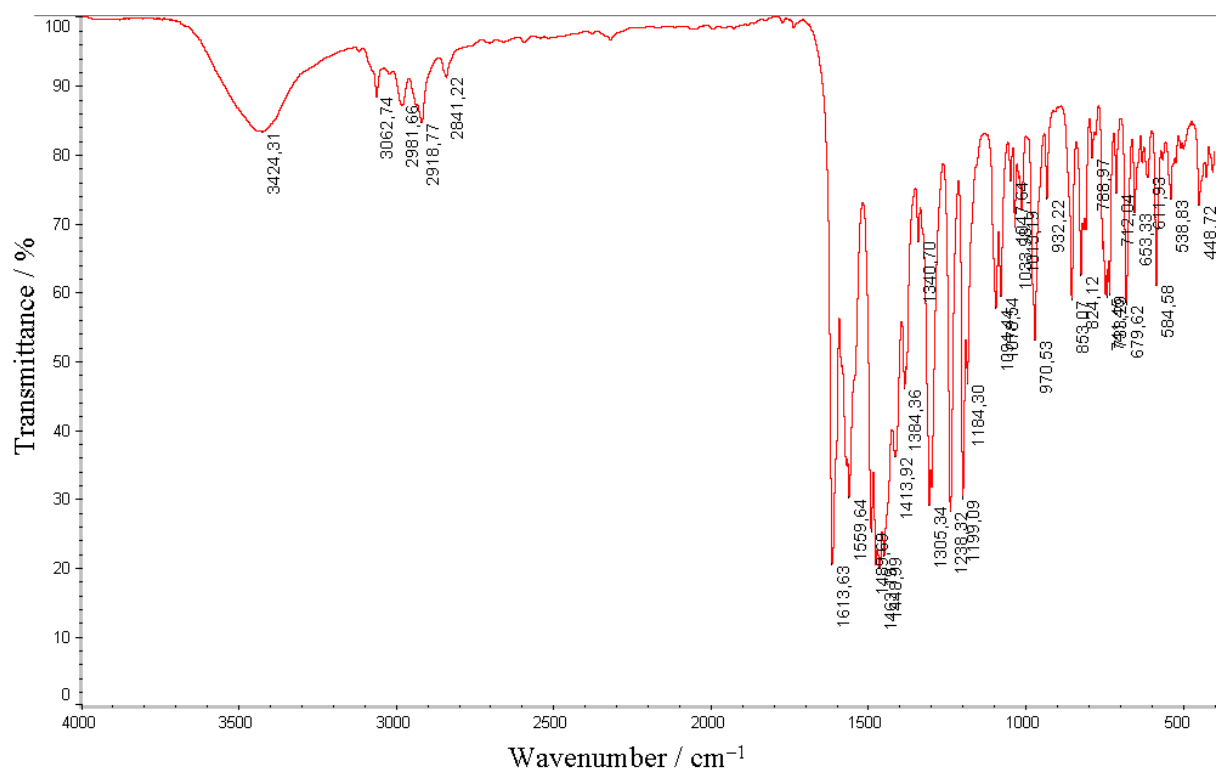

**Fig. S10** IR spectrum of compound **3** measured in the 4000–450  $\text{cm}^{-1}$  region, using a KBr pellet.

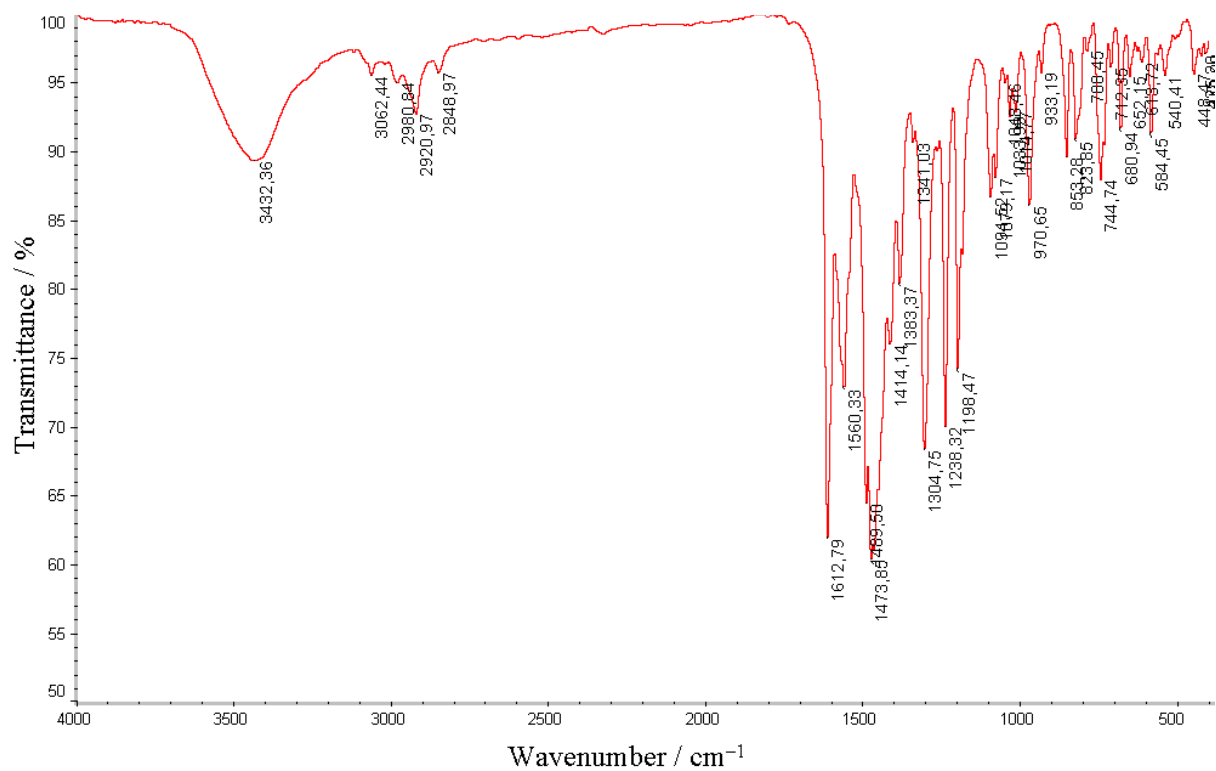

**Fig. S11** IR spectrum of compound **4** measured in the 4000–450  $\text{cm}^{-1}$  region, using a KBr pellet.

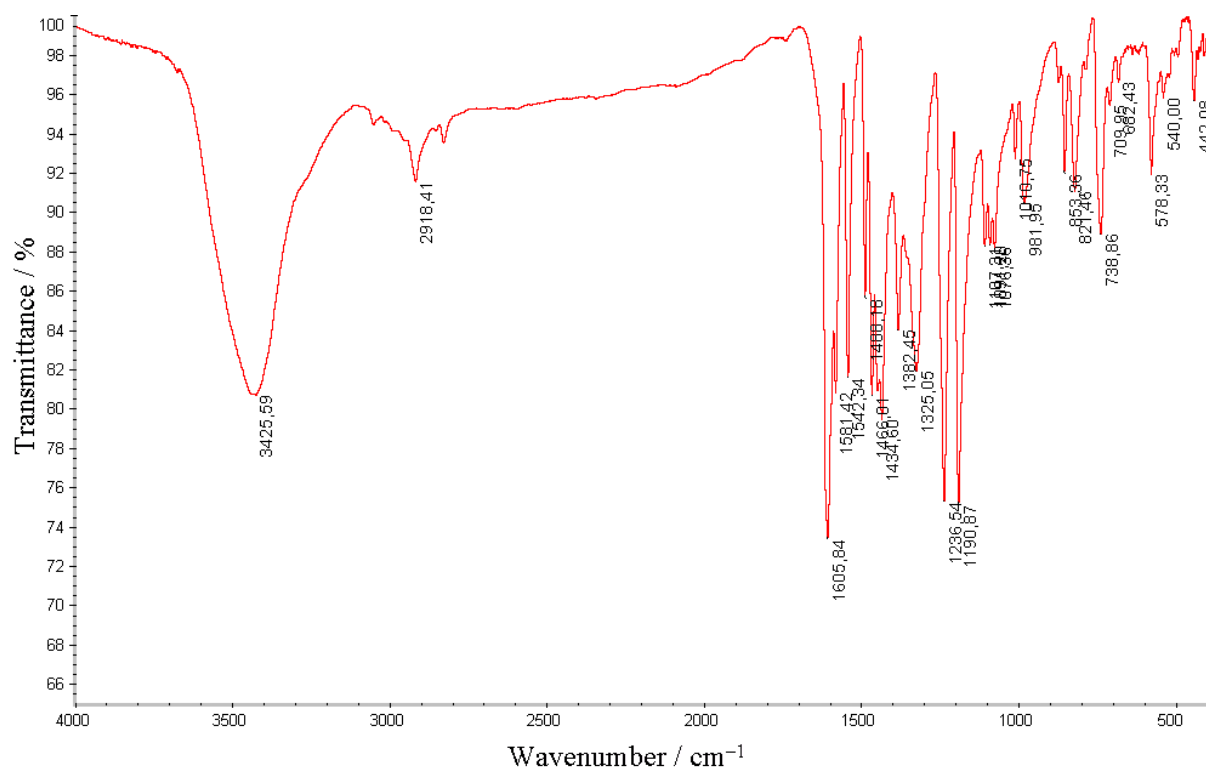

**Fig. S12** IR spectrum of compound **5** measured in the 4000–450  $\text{cm}^{-1}$  region, using a KBr pellet.

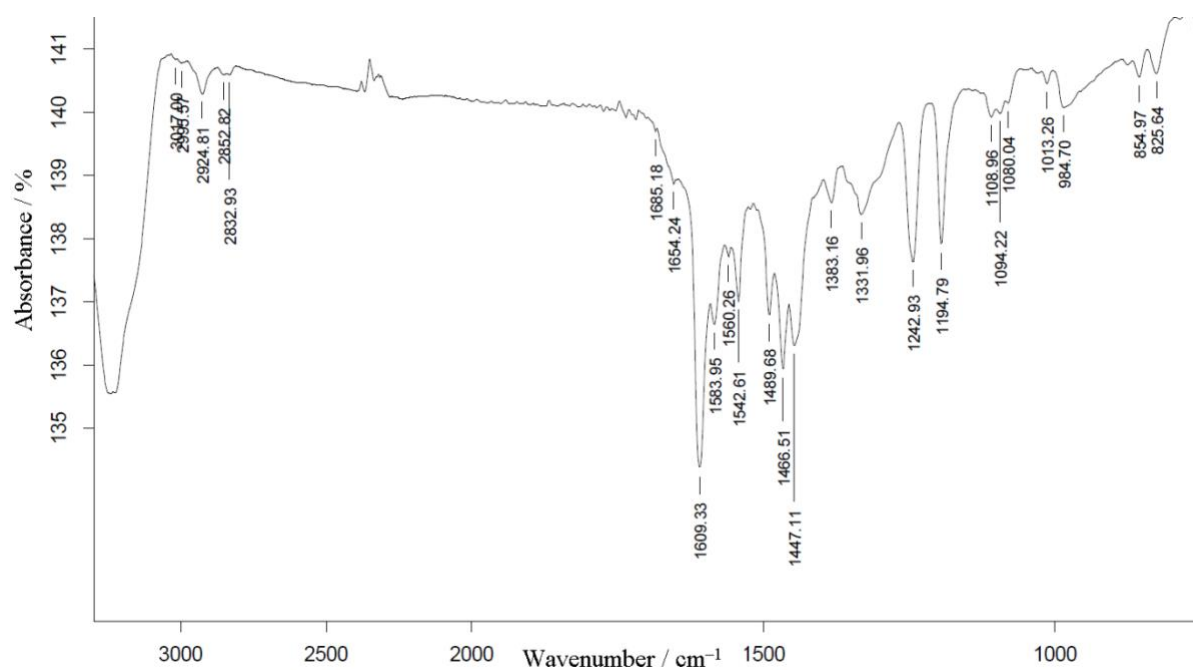

**Fig. S13** IRRAS spectrum of compound **2** (washed dropwise with MeOH).

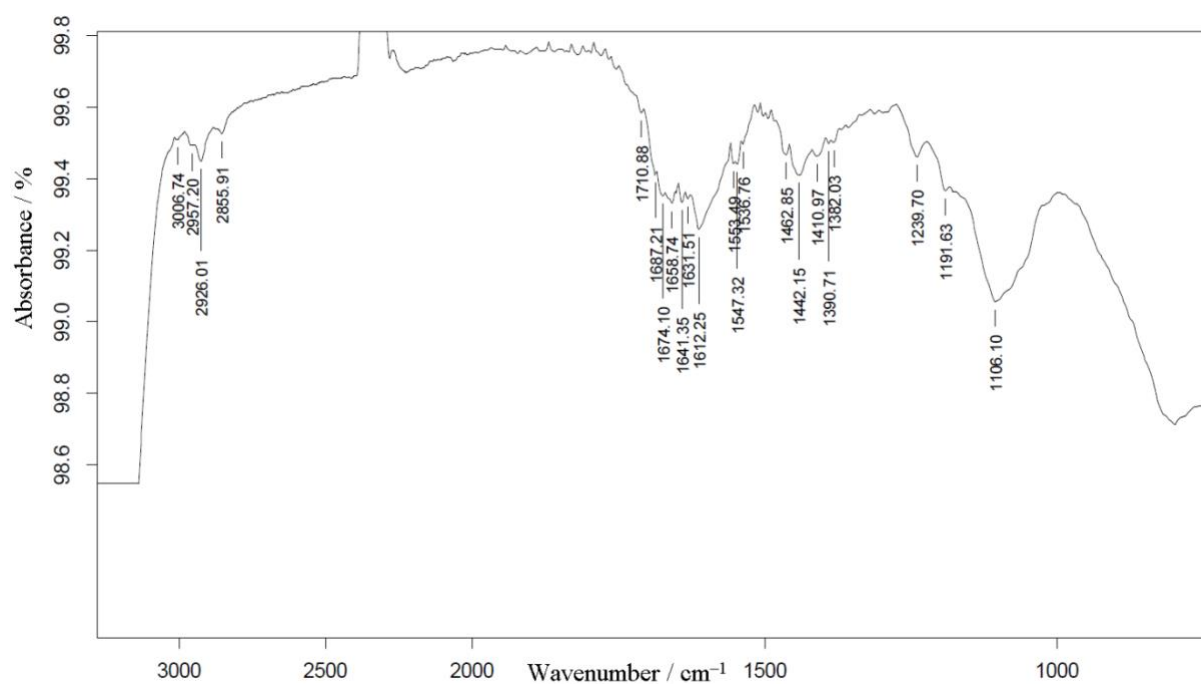

**Fig. S14** IRRAS spectrum of compound **2** after dipping in MeOH (washed more intense).

## 4. Crystal data and structure refinement details for compounds 1–6 and HL·SMe

**Table S2** Crystal data and structure refinement for 1–3.

| Sample                                                                               | 1                                                                                 | 2                                                                                  | 3                                                                                       |
|--------------------------------------------------------------------------------------|-----------------------------------------------------------------------------------|------------------------------------------------------------------------------------|-----------------------------------------------------------------------------------------|
| Radiation type                                                                       | Mo K $\alpha$                                                                     | Mo K $\alpha$                                                                      | Mo K $\alpha$                                                                           |
| Empirical formula                                                                    | C <sub>35</sub> H <sub>37</sub> CuGdN <sub>3</sub> O <sub>12</sub> S <sub>2</sub> | C <sub>35</sub> H <sub>37</sub> CuN <sub>3</sub> O <sub>12</sub> S <sub>2</sub> Tb | C <sub>34.75</sub> H <sub>37</sub> CuDyN <sub>3</sub> O <sub>11.75</sub> S <sub>2</sub> |
| Formula weight, g/mol                                                                | 976.59                                                                            | 978.26                                                                             | 974.83                                                                                  |
| Crystal system                                                                       | Triclinic                                                                         | Triclinic                                                                          | Triclinic                                                                               |
| Space group                                                                          | <i>P</i> –1                                                                       | <i>P</i> –1                                                                        | <i>P</i> –1                                                                             |
| <i>a</i> / Å                                                                         | 10.4420(15)                                                                       | 10.41025(18)                                                                       | 10.2537(4)                                                                              |
| <i>b</i> / Å                                                                         | 12.9883(19)                                                                       | 13.0045(3)                                                                         | 13.0750(5)                                                                              |
| <i>c</i> / Å                                                                         | 14.766(2)                                                                         | 14.8408(2)                                                                         | 15.0238(5)                                                                              |
| $\alpha$                                                                             | 110.052(3)                                                                        | 110.2260(19) °                                                                     | 110.534(3) °                                                                            |
| $\beta$                                                                              | 90.300(3)                                                                         | 90.3313(14) °                                                                      | 90.219(3) °                                                                             |
| $\gamma$                                                                             | 94.099(3)                                                                         | 93.9638(16) °                                                                      | 93.063(3) °                                                                             |
| Volume / Å <sup>3</sup>                                                              | 1875.5(5)                                                                         | 1879.79(7)                                                                         | 1882.98(13)                                                                             |
| <i>Z</i>                                                                             | 2                                                                                 | 2                                                                                  | 2                                                                                       |
| <i>D</i> <sub>calc</sub> , g/cm <sup>3</sup>                                         | 1.729                                                                             | 1.728                                                                              | 1.719                                                                                   |
| Absorption coefficient, mm <sup>–1</sup>                                             | 2.497                                                                             | 2.609                                                                              | 2.709                                                                                   |
| <i>F</i> (000)                                                                       | 978                                                                               | 980                                                                                | 975                                                                                     |
| Crystal size, mm                                                                     | 0.17 × 0.27 × 0.32                                                                | 0.11 × 0.35 × 0.43                                                                 | 0.15 × 0.25 × 0.28                                                                      |
| Theta range for data collection                                                      | 1.67° – 23.32°                                                                    | 3.15° – 26.02°                                                                     | 3.41° – 26.02°                                                                          |
| Completeness to $\theta_{\max}$                                                      | 99.6 %                                                                            | 99.8 %                                                                             | 99.6 %                                                                                  |
| Index ranges                                                                         | –11 < <i>h</i> < 11,<br>–14 < <i>k</i> < 14,<br>–16 < <i>l</i> < 16               | –12 < <i>h</i> < 12,<br>–16 < <i>k</i> < 16,<br>–18 < <i>l</i> < 18                | –12 < <i>h</i> < 12,<br>–16 < <i>k</i> < 16,<br>–18 < <i>l</i> < 18                     |
| Reflections collected                                                                | 26294                                                                             | 37878                                                                              | 37026                                                                                   |
| Independent reflections                                                              | 5418                                                                              | 7400                                                                               | 7389                                                                                    |
| <i>R</i> <sub>int</sub>                                                              | 0.0984                                                                            | 0.0545                                                                             | 0.0557                                                                                  |
| Observed ( <i>I</i> > 2 $\sigma$ ( <i>I</i> ))                                       | 4767                                                                              | 6626                                                                               | 6042                                                                                    |
| Absorption correction                                                                | Semi-empirical from equivalents                                                   | Analytical numerical using a multifaceted crystal model                            |                                                                                         |
| <i>T</i> <sub>min</sub> / <i>T</i> <sub>max</sub>                                    | 0.3551 / 0.6762                                                                   | 0.2506 / 0.7661                                                                    | 0.4209 / 0.6829                                                                         |
| Data / restraints / parameters                                                       | 5418 / 12 / 505                                                                   | 7400 / 0 / 505                                                                     | 7389 / 18 / 548                                                                         |
| Goodness-of-fit on <i>F</i> <sup>2</sup>                                             | 1.019                                                                             | 0.994                                                                              | 1.055                                                                                   |
| <i>R</i> <sub>1</sub> , <i>wR</i> <sub>2</sub> ( <i>I</i> > 2 $\sigma$ ( <i>I</i> )) | <i>R</i> <sub>1</sub> = 0.0397, <i>wR</i> <sub>2</sub> = 0.0914                   | <i>R</i> <sub>1</sub> = 0.0275, <i>wR</i> <sub>2</sub> = 0.0651                    | <i>R</i> <sub>1</sub> = 0.0436, <i>wR</i> <sub>2</sub> = 0.1012                         |
| <i>R</i> <sub>1</sub> , <i>wR</i> <sub>2</sub> (all data)                            | <i>R</i> <sub>1</sub> = 0.0471, <i>wR</i> <sub>2</sub> = 0.0964                   | <i>R</i> <sub>1</sub> = 0.0343, <i>wR</i> <sub>2</sub> = 0.0699                    | <i>R</i> <sub>1</sub> = 0.0623, <i>wR</i> <sub>2</sub> = 0.1159                         |
| Largest diff. peak and hole / e Å <sup>–3</sup>                                      | 0.730 / –1.352                                                                    | 0.7571 / –0.558                                                                    | 2.422 / –1.621                                                                          |

**Table S3 (continuation)** Crystal data and structure refinement for **4–6** and **HL·SMe**.

| Sample                                                                               | <b>4</b>                                                                          | <b>5</b>                                                                                        | <b>6</b>                                                                       | <b>HL·SMe</b>                                                      |
|--------------------------------------------------------------------------------------|-----------------------------------------------------------------------------------|-------------------------------------------------------------------------------------------------|--------------------------------------------------------------------------------|--------------------------------------------------------------------|
| Radiation type                                                                       | Cu K $\alpha$                                                                     | Mo K $\alpha$                                                                                   | Mo K $\alpha$                                                                  | Mo K $\alpha$                                                      |
| Empirical formula                                                                    | C <sub>35</sub> H <sub>37</sub> CuN <sub>3</sub> O <sub>12</sub> S <sub>2</sub> Y | C <sub>63</sub> H <sub>68</sub> Cu <sub>2</sub> N <sub>5</sub> NaO <sub>14</sub> S <sub>4</sub> | C <sub>30</sub> H <sub>28</sub> CuN <sub>2</sub> O <sub>4</sub> S <sub>2</sub> | C <sub>15</sub> H <sub>15</sub> NO <sub>2</sub> S                  |
| Formula weight, g/mol                                                                | 908.25                                                                            | 1397.53                                                                                         | 608.20                                                                         | 273.34                                                             |
| Crystal system                                                                       | Triclinic                                                                         | Monoclinic                                                                                      | Monoclinic                                                                     | Orthorhombic                                                       |
| Space group                                                                          | <i>P</i> –1                                                                       | <i>P</i> 2 <sub>1</sub> / <i>c</i>                                                              | <i>P</i> 2 <sub>1</sub> / <i>c</i>                                             | <i>P</i> 2 <sub>1</sub> 2 <sub>1</sub> 2 <sub>1</sub>              |
| <i>a</i> / Å                                                                         | 10.4154(3)                                                                        | 14.9698(3)                                                                                      | 13.6389(4)                                                                     | 6.47212(10)                                                        |
| <i>b</i> / Å                                                                         | 13.0079(4)                                                                        | 24.2955(4)                                                                                      | 15.8734(5)                                                                     | 11.17376(19)                                                       |
| <i>c</i> / Å                                                                         | 14.8097(5)                                                                        | 20.7256(5)                                                                                      | 13.4847(4)                                                                     | 18.3473(2)                                                         |
| $\alpha$                                                                             | 110.182(3)                                                                        | 90 °                                                                                            | 90 °                                                                           | 90 °                                                               |
| $\beta$                                                                              | 90.353(2)                                                                         | 110.749(3) °                                                                                    | 114.537(4) °                                                                   | 90 °                                                               |
| $\gamma$                                                                             | 93.981(2)                                                                         | 90 °                                                                                            | 90 °                                                                           | 90 °                                                               |
| Volume / Å <sup>3</sup>                                                              | 1877.74(11)                                                                       | 7049.0(2)                                                                                       | 2655.75(16)                                                                    | 1326.84(3)                                                         |
| <i>Z</i>                                                                             | 2                                                                                 | 4                                                                                               | 4                                                                              | 4                                                                  |
| <i>D</i> <sub>calc</sub> , g/cm <sup>3</sup>                                         | 1.606                                                                             | 1.317                                                                                           | 1.521                                                                          | 1.368                                                              |
| Absorption coefficient, mm <sup>–1</sup>                                             | 4.372                                                                             | 0.790                                                                                           | 1.021                                                                          | 0.241                                                              |
| <i>F</i> (000)                                                                       | 928                                                                               | 2904                                                                                            | 1260                                                                           | 576                                                                |
| Crystal size, mm                                                                     | 0.08 × 0.16 × 0.41                                                                | 0.12 × 0.45 × 0.75                                                                              | 0.18 × 0.39 × 0.61                                                             | 0.09 × 0.22 × 0.50                                                 |
| Theta range for data collection                                                      | 7.44° – 68.25°                                                                    | 4.12° – 26.02°                                                                                  | 3.53° – 25.68°                                                                 | 4.26° – 26.37°                                                     |
| Completeness to $\theta_{\max}$                                                      | 96.0 %                                                                            | 99.5 %                                                                                          | 99.8 %                                                                         | 99.4 %                                                             |
| Index ranges                                                                         | –12 < <i>h</i> < 12,<br>–15 < <i>k</i> < 15,<br>–17 < <i>l</i> < 17               | –18 < <i>h</i> < 18,<br>–29 < <i>k</i> < 29,<br>–25 < <i>l</i> < 25                             | –16 < <i>h</i> < 16,<br>–19 < <i>k</i> < 19,<br>–16 < <i>l</i> < 16            | –8 < <i>h</i> < 8,<br>–13 < <i>k</i> < 13,<br>–22 < <i>l</i> < 22  |
| Reflections collected                                                                | 30628                                                                             | 73696                                                                                           | 26616                                                                          | 13871                                                              |
| Independent reflections                                                              | 6623                                                                              | 13844                                                                                           | 5030                                                                           | 2688                                                               |
| <i>R</i> <sub>int</sub>                                                              | 0.1005                                                                            | 0.0626                                                                                          | 0.0578                                                                         | 0.0342                                                             |
| Observed ( <i>I</i> > 2 $\sigma$ ( <i>I</i> ))                                       | 5877                                                                              | 10037                                                                                           | 4159                                                                           | 2476                                                               |
| Absorption correction                                                                | Numerical based on gaussian integration over a multifaceted crystal model         | Analytical numerical using a multifaceted crystal model                                         | Numerical based on gaussian integration over a multifaceted crystal model      | Analytical numerical using a multifaceted crystal model            |
| <i>T</i> <sub>min</sub> / <i>T</i> <sub>max</sub>                                    | 0.1918 / 0.7267                                                                   | 0.9113 / 0.9122                                                                                 | 0.0518 / 0.8360                                                                | 0.3737 / 0.9779                                                    |
| Data / restraints / parameters                                                       | 6623 / 0 / 505                                                                    | 13844 / 43 / 838                                                                                | 5030 / 0 / 352                                                                 | 2688 / 0 / 172                                                     |
| Goodness-of-fit on <i>F</i> <sup>2</sup>                                             | 1.040                                                                             | 0.976                                                                                           | 1.056                                                                          | 1.047                                                              |
| <i>R</i> <sub>1</sub> , <i>wR</i> <sub>2</sub> ( <i>I</i> > 2 $\sigma$ ( <i>I</i> )) | <i>R</i> <sub>1</sub> = 0.0673,<br><i>wR</i> <sub>2</sub> = 0.1701                | <i>R</i> <sub>1</sub> = 0.0636,<br><i>wR</i> <sub>2</sub> = 0.1817                              | <i>R</i> <sub>1</sub> = 0.0593,<br><i>wR</i> <sub>2</sub> = 0.1540             | <i>R</i> <sub>1</sub> = 0.0283,<br><i>wR</i> <sub>2</sub> = 0.0693 |
| <i>R</i> <sub>1</sub> , <i>wR</i> <sub>2</sub> (all data)                            | <i>R</i> <sub>1</sub> = 0.0727,<br><i>wR</i> <sub>2</sub> = 0.1784                | <i>R</i> <sub>1</sub> = 0.0929,<br><i>wR</i> <sub>2</sub> = 0.2101                              | <i>R</i> <sub>1</sub> = 0.0704,<br><i>wR</i> <sub>2</sub> = 0.1678             | <i>R</i> <sub>1</sub> = 0.0326,<br><i>wR</i> <sub>2</sub> = 0.0722 |
| Largest diff. peak and hole / e Å <sup>–3</sup>                                      | 1.701 / –1.172                                                                    | 1.451 / –0.743                                                                                  | 3.613 / –0.658                                                                 | 0.159 / –0.245                                                     |

## 5. A comparative analysis of structural data between compounds 1–5 and related complexes described in the literature

**Table S4** Selected bond metrics for compounds 1–4.

| Bond                                       | Distances in Å      |                     |                     |                     |
|--------------------------------------------|---------------------|---------------------|---------------------|---------------------|
|                                            | Ln = Gd (1)         | Ln = Tb (2)         | Ln = Dy (3)         | Ln = Y (4)          |
| Ln–O <sub>acetate</sub> (bridging)         | 2.316(4)            | 2.290(2)            | 2.275(4)            | 2.267(3)            |
| Ln–O <sub>acetate</sub> (chelating)        | 2.432(4) – 2.476(4) | 2.404(2) – 2.463(2) | 2.396(4) – 2.443(4) | 2.381(3) – 2.449(3) |
| Ln–O <sub>nit</sub>                        | 2.508(4) – 2.517(4) | 2.489(3) – 2.513(2) | 2.473(4) – 2.515(5) | 2.469(3) – 2.476(3) |
| Ln–O <sub>ether</sub>                      | 2.474(4) – 2.578(4) | 2.466(2) – 2.581(2) | 2.463(4) – 2.573(4) | 2.439(3) – 2.567(3) |
| Ln–O <sub>alc</sub>                        | 2.302(4) – 2.353(4) | 2.292(2) – 2.347(2) | 2.292(4) – 2.344(4) | 2.267(3) – 2.318(3) |
| Cu–O <sub>acetate</sub>                    | 2.196(4)            | 2.196(2)            | 2.209(4)            | 2.192(3)            |
| Cu–O <sub>alc</sub>                        | 1.957(4) – 1.962(4) | 1.953(2) – 1.969(2) | 1.958(4) – 1.964(4) | 1.964(3) – 1.970(3) |
| Cu–N <sub>imi</sub>                        | 1.998(5) – 2.012(4) | 1.997(3) – 2.017(3) | 2.002(5) – 2.019(5) | 2.006(3) – 2.022(3) |
| Ln <sub>intra</sub> ···Cu <sub>intra</sub> | 3.3960(8)           | 3.3832(4)           | 3.3870(8)           | 3.3605(6)           |
| Cu <sub>intra</sub> ···S <sub>intra</sub>  | 7.10                | 7.10                | disorder            | disorder            |

Only three {CuY} complexes supported by Schiff base ligands are reported in the Cambridge Structural Database (CSD).<sup>[5,6,7]</sup> In those compounds, the *copper(II)* ions show a *square-planar* coordination environment and the *yttrium(III)* ions are coordinated by *eight oxygen atoms*. This is different from the situation in compound **4** where the *copper(II)* ion exhibits a *square-pyramidal* geometry and the *yttrium(III)* ion is coordinated by *nine oxygen atoms* (see Table S4). Complexes described in the literature consist of one Schiff base ligand (salen or saloph) and three hexafluoroacetylacetonate (hfa) co-ligands which saturate the coordination environment of yttrium. In comparison, compound **4** contains two Schiff base ligands, one bridging acetate, one chelating acetate and one chelating nitrate.

A {CuDy} complex similar to compound **3** was published by Zhang *et al.* in 2013.<sup>[8]</sup> The metal ions in that complex show the same coordination environment (see Table S5), i.e. they are bridged by one acetate ligand, and an acetate and a nitrate are at Dy. Contrary to compound **3** with two thioether-augmented Schiff base ligands, the complex described in the literature is supported by only one *o*-vanillin salen Schiff base ligand (H<sub>2</sub>L<sup>1</sup> see Fig. S15).

A search for 3d-4f complexes with the “non-functionalized” Schiff base ligand (HL) such as phenol-2-methoxy-6-[(*E*)-(phenylimino)methyl] gave two hits<sup>[9,10]</sup> in the Cambridge Structural Database. In 2014 Upadhyay *et al.* reported a dinuclear {ZnDy} complex<sup>[9]</sup>

([ZnDy(L<sup>2</sup>)<sub>2</sub>(OOCMe)(NO<sub>3</sub>)<sub>2</sub>]; HL<sup>2</sup> = Schiff base ligand; see Fig. S15) which is *quasi*-isostructural to compound **3** (see Table S5). A minor difference can be observed in the coordination of chelating ligands at Dy: two nitrate ions in the {ZnDy} complex and one nitrate / one acetate in compound **3**. Another related example is however a linear trinuclear {Ni<sub>2</sub>Gd} complex<sup>[10]</sup> ([Ni<sub>2</sub>Gd(L<sup>2</sup>)<sub>6</sub>]NO<sub>3</sub>; HL<sup>2</sup> = Schiff base ligand) which is mono-cationic (see Table S5). In this complex, the nickel atoms are in an octahedral N<sub>3</sub>O<sub>3</sub> coordination environment and gadolinium exhibits an icosahedral geometry.

**Table S5** Coordination number (CN) of metal ions in compounds **1–4** (see *this work*) and in the reported, related coordination complexes. Distances (in Å) between 3d ions and Ln/Y ions in these heterometallic compounds are given.

| Reference        | Formula                                                                          | CN of 3d | CN of Ln and Y | 3d...Ln/Y distance |
|------------------|----------------------------------------------------------------------------------|----------|----------------|--------------------|
| <i>this work</i> | [CuLn(L·SMe) <sub>2</sub> (OOCMe) <sub>2</sub> (NO <sub>3</sub> ) <sub>2</sub> ] | 5        | 9              | 3.361 – 3.396      |
| [5]              | [CuY(hfa) <sub>3</sub> (salen)]                                                  | 4        | 8              | 3.275              |
| [6]              | [CuY(hfa) <sub>3</sub> (saloph)]                                                 | 4        | 8              | 3.201              |
| [8]              | [CuDy(L <sup>1</sup> )(OOCMe) <sub>2</sub> (NO <sub>3</sub> ) <sub>2</sub> ]     | 5        | 9              | 3.326              |
| [9]              | [ZnDy(L <sup>2</sup> ) <sub>2</sub> (OOCMe)(NO <sub>3</sub> ) <sub>2</sub> ]     | 5        | 9              | 3.431              |
| [10]             | [Ni <sub>2</sub> Gd(L <sup>2</sup> ) <sub>6</sub> ]NO <sub>3</sub>               | 6        | 12             | 3.325              |

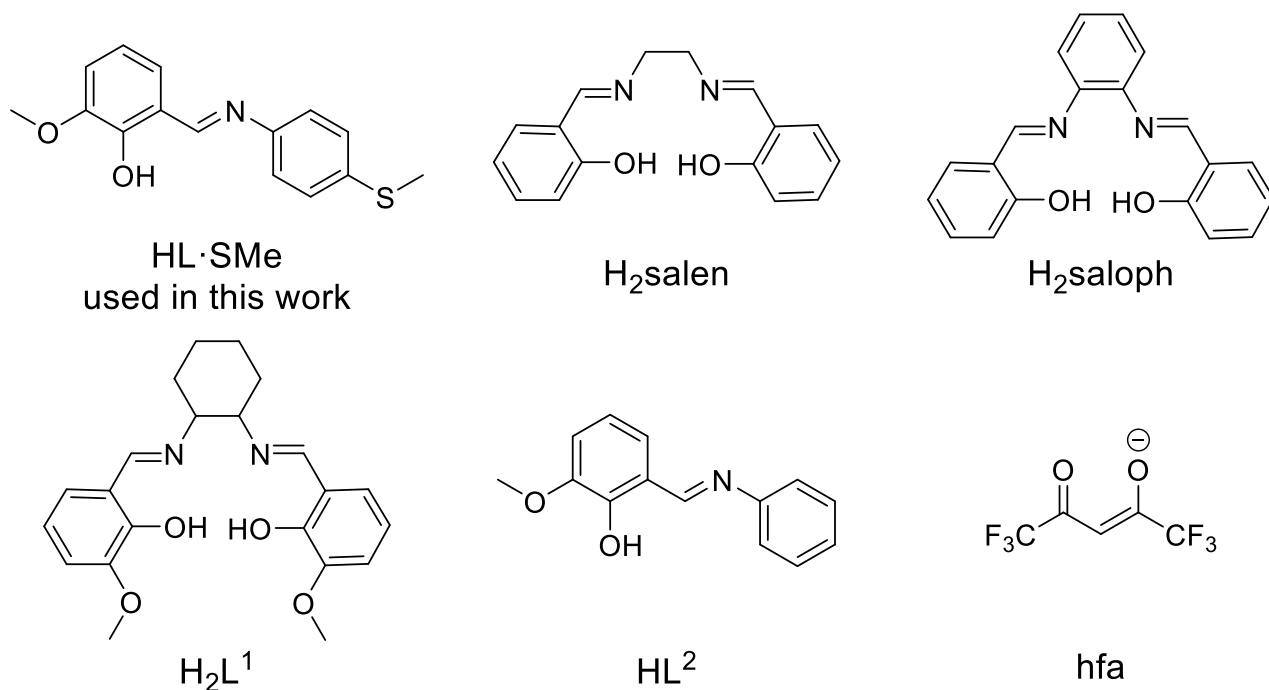

**Fig. S15** Ligands present in compounds listed in Table S5.



The Cambridge Structural Database shows twelve hits for Schiff base-supported {CuNaCu} complexes.<sup>[11,12,13,14,15,16,17]</sup> Interestingly, ten of those twelve reported complexes contain perchlorate as counter-ion (4 hits) or coordinated to the central sodium ion (6 hits). Only in two other cases, the metal ions are characterized by a coordination environment identical to that in compound **5** (see Table S6). In 2013 Maiti *et al.* published a complex<sup>[15]</sup> with the formula [Cu<sub>2</sub>Na(Lig<sup>1</sup>)<sub>2</sub>]ClO<sub>4</sub>·0.5H<sub>2</sub>O (H<sub>2</sub>Lig<sup>1</sup> = *N,N'*-Bis(3-methoxysalicylidenimino)-1,3-diaminopentane; see Fig. S16). The Cu···Cu distance and the Cu–Na–Cu angle in this complex are 7.001 Å and 174.64(3)°, respectively. In 2013 Biswas *et al.* published another {CuNaCu} complex<sup>[16]</sup> with the formula [Cu<sub>2</sub>Na(Lig<sup>2</sup>)<sub>2</sub>]ClO<sub>4</sub>·CH<sub>3</sub>COCH<sub>3</sub> (H<sub>2</sub>Lig<sup>2</sup> = 3-methoxysalicylaldehyde-diamine, with *trans*-1,2-diaminocyclohexane as diamine moiety; see Fig. S16). The Cu···Cu distance and the Cu–Na–Cu angle in this complex are 6.837 Å and 166.991(80)°, respectively. These reported Cu···Cu distances are slightly longer than that (6.813 Å) in compound **5** with a nearly perfect linear metal core (Cu–Na–Cu angle = 178.74(6)°).

**Table S6** Comparison between selected structural data of compound **5** (see *this work*) and the reported, related coordination complexes.

| Reference        | Formula                                                               | Cu···Cu distance<br>(in Å) | Cu···Na distance<br>(in Å) | Cu–Na–Cu angle<br>(in °) |
|------------------|-----------------------------------------------------------------------|----------------------------|----------------------------|--------------------------|
| <i>this work</i> | [Cu <sub>2</sub> Na(L·SMe) <sub>4</sub> ]NO <sub>3</sub>              | 6.813                      | 3.406 and 3.408            | 178.75                   |
| [15]             | [Cu <sub>2</sub> Na(Lig <sup>1</sup> ) <sub>2</sub> ]ClO <sub>4</sub> | 7.001                      | 3.499 and 3.510            | 174.64                   |
| [16]             | [Cu <sub>2</sub> Na(Lig <sup>2</sup> ) <sub>2</sub> ]ClO <sub>4</sub> | 6.837                      | 3.433 and 3.448            | 166.99                   |

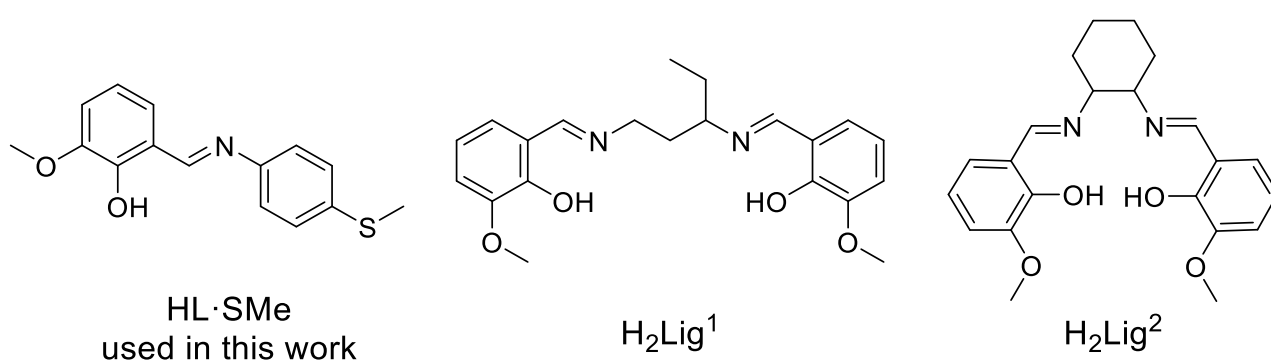

**Fig. S16** Ligands present in compounds listed in Table S6.

## 6. Measured ESI-MS spectra of compounds 1–5

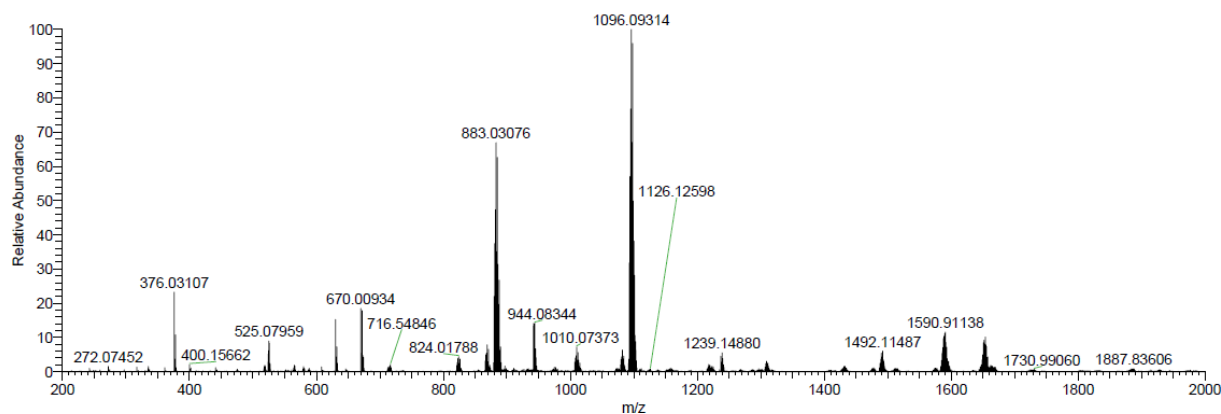

**Fig. S17** ESI-MS spectrum of compound 1 in the positive ion mode.

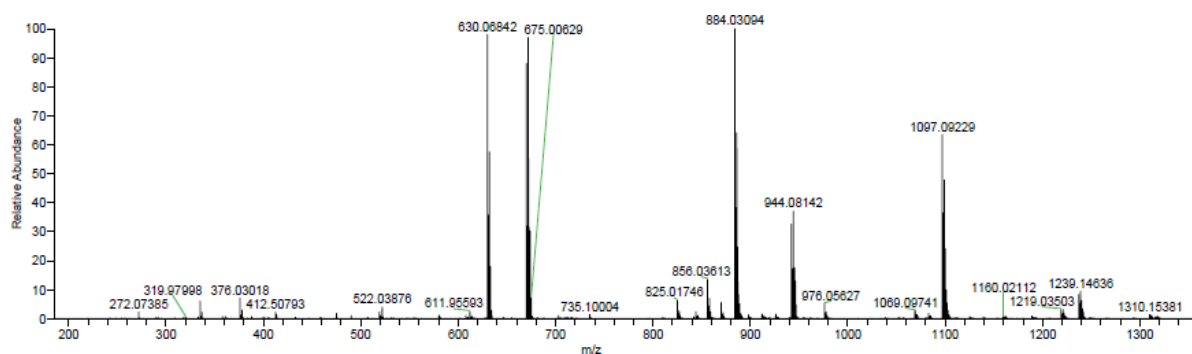

**Fig. S18** ESI-MS spectrum of compound 2 in the positive ion mode.

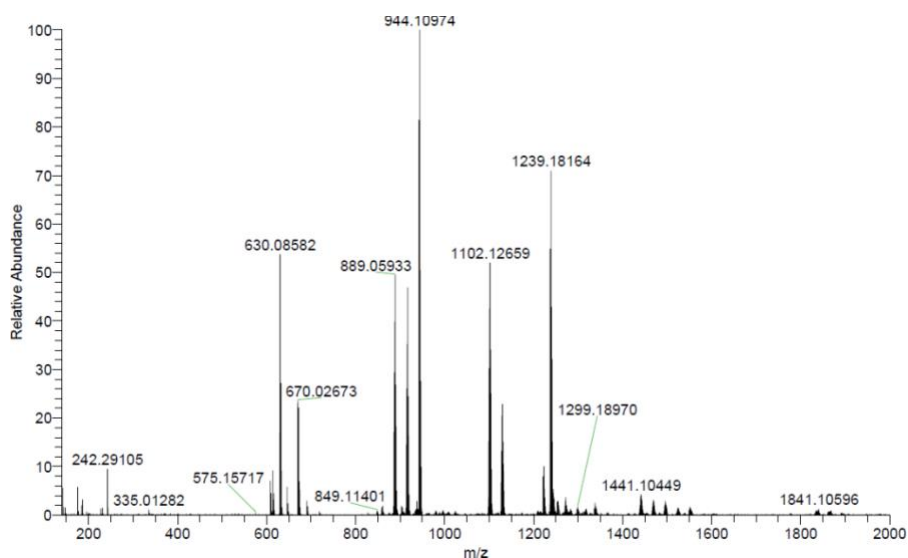

**Fig. S19** ESI-MS spectrum of compound 3 in the positive ion mode.

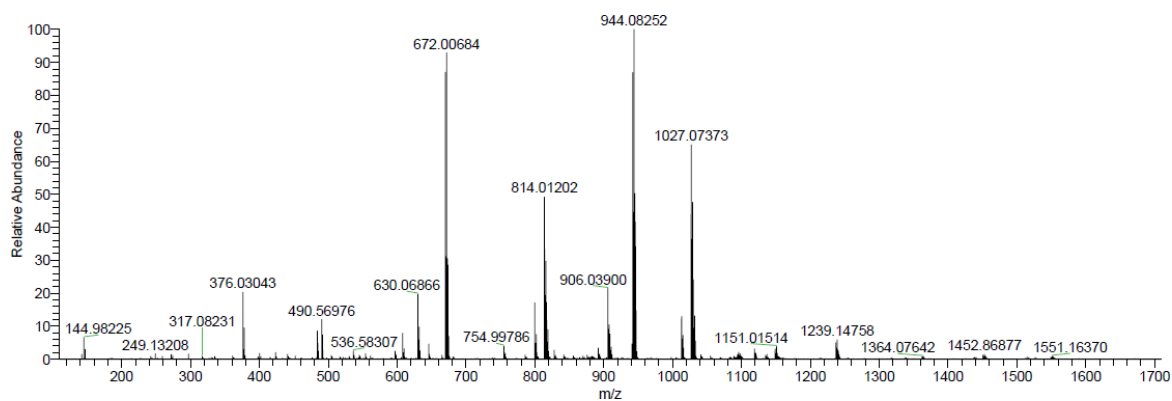

**Fig. S20** ESI-MS spectrum of compound **4** in the positive ion mode.

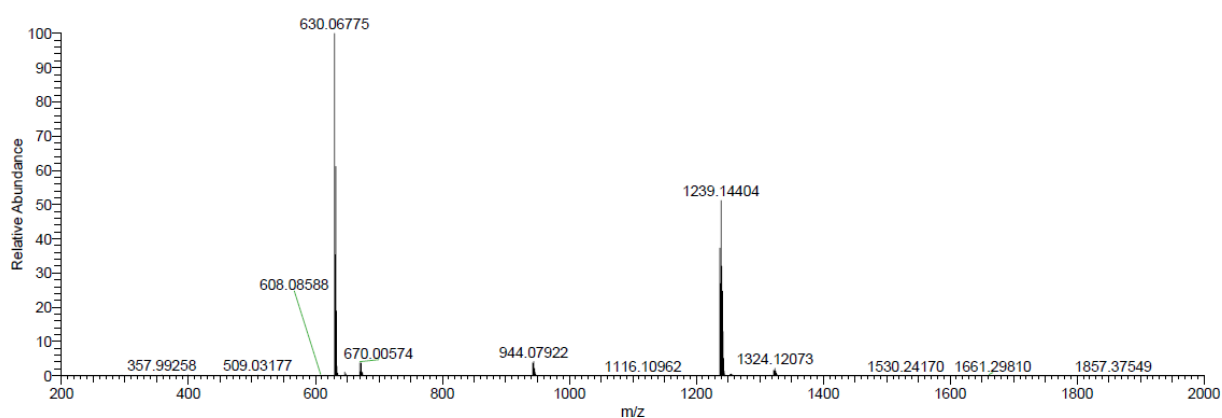

**Fig. S21** ESI-MS spectrum of compound **5** in the positive ion mode.

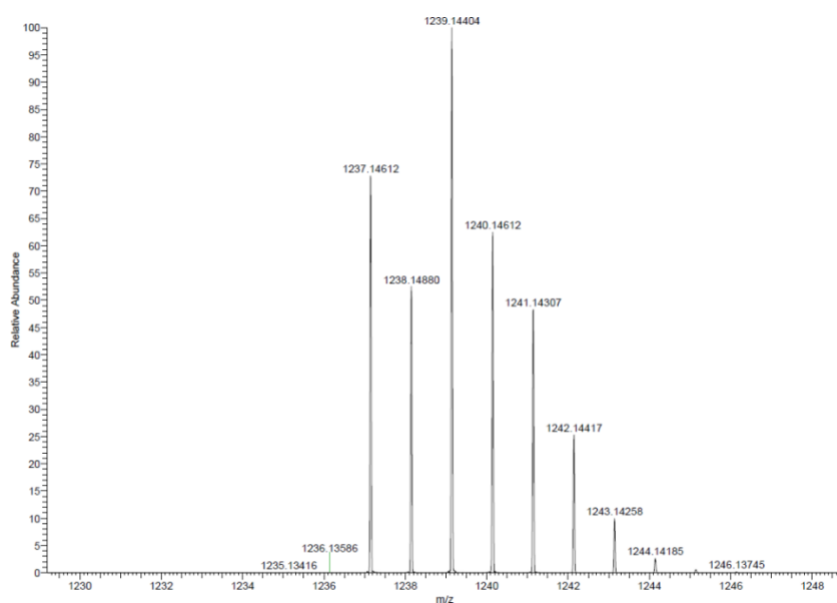

**Fig. S22** Zoom of the ESI-MS spectrum of compound **5** in the region about  $m/z$  1200.

## 7. Calculated isotopic pattern of compounds 1–5

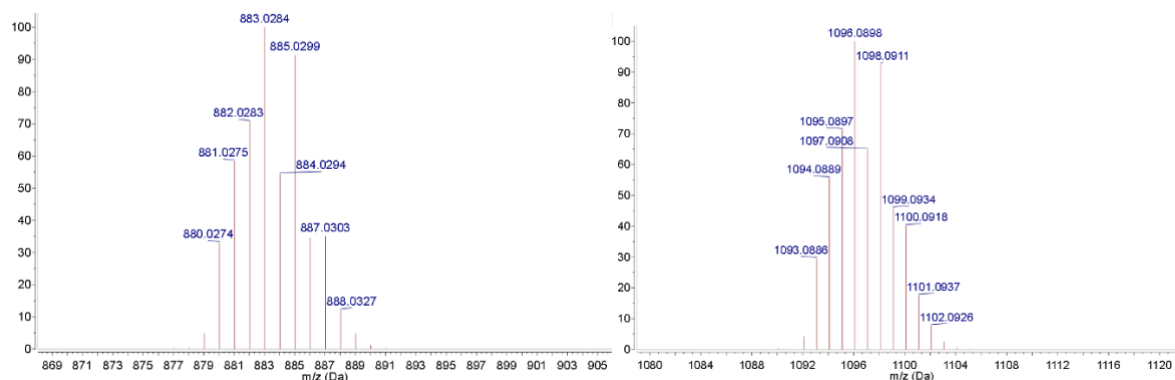

**Fig. S23** Calculated isotopic pattern of  $[\text{CuGd}(\text{L}\cdot\text{SMe})_2(\text{OOCMe})_2]^+$  (left) and  $[\text{CuGd}(\text{L}\cdot\text{SMe})_3(\text{OOCMe})]^+$  (right) fragments in compound **1** (for experiment see Fig. S17).

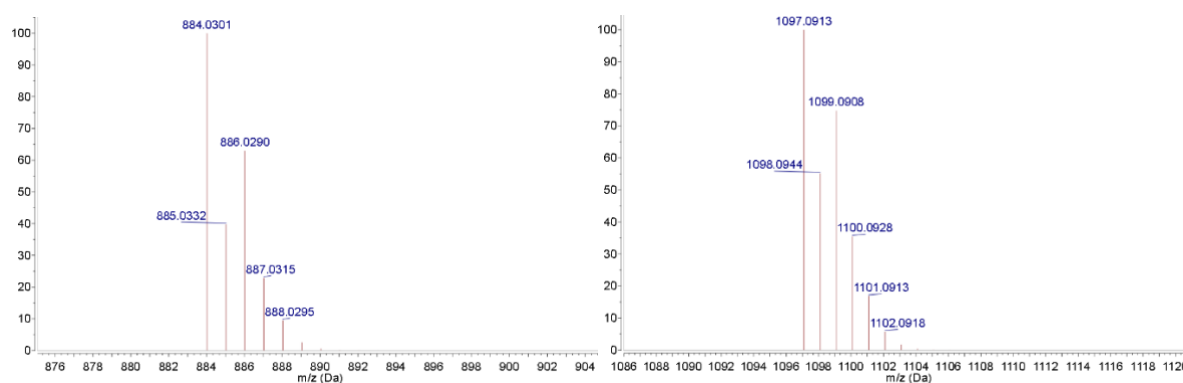

**Fig. S24** Calculated isotopic pattern of  $[\text{CuTb}(\text{L}\cdot\text{SMe})_2(\text{OOCMe})_2]^+$  (left) and  $[\text{CuTb}(\text{L}\cdot\text{SMe})_3(\text{OOCMe})]^+$  (right) fragments in compound **2** (for experiment see Fig. S18).

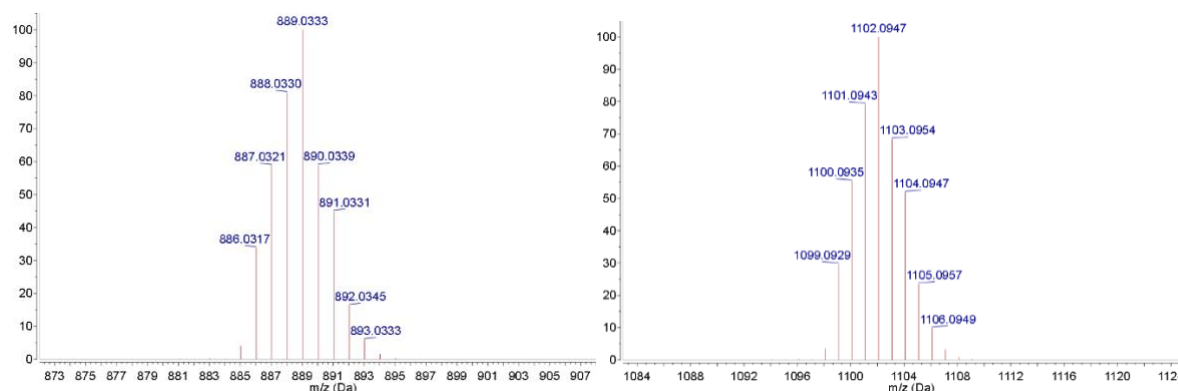

**Fig. S25** Calculated isotopic pattern of  $[\text{CuDy}(\text{L}\cdot\text{SMe})_2(\text{OOCMe})_2]^+$  (left) and  $[\text{CuDy}(\text{L}\cdot\text{SMe})_3(\text{OOCMe})]^+$  (right) fragments in compound **3** (for experiment see Fig. S19).

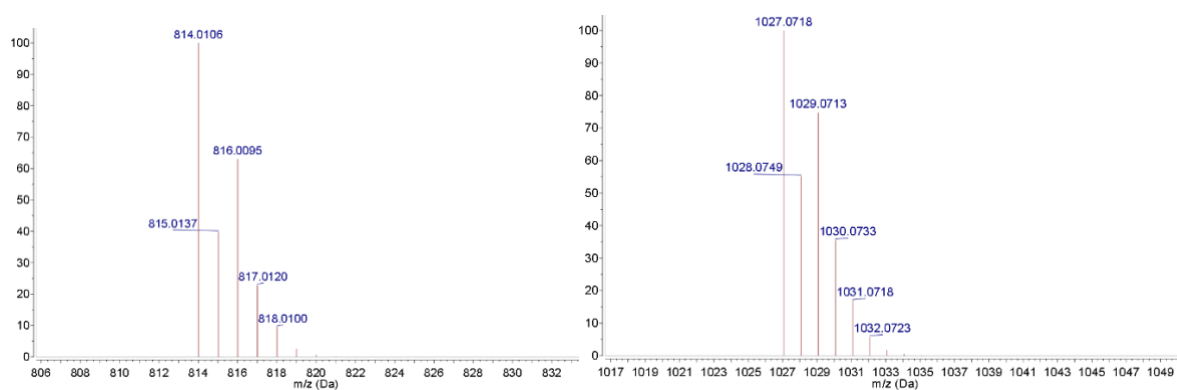

**Fig. S26** Calculated isotopic pattern of  $[\text{CuY}(\text{L}\cdot\text{SMe})_2(\text{OOCMe})_2]^+$  (left) and  $[\text{CuY}(\text{L}\cdot\text{SMe})_3(\text{OOCMe})]^+$  (right) fragments in compound **4** (for experiment see Fig. S20).

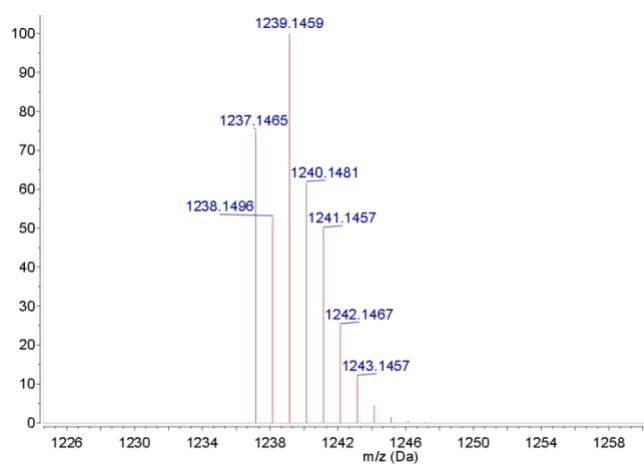

**Fig. S27** Calculated isotopic pattern of  $[\text{Cu}_2\text{Na}(\text{L}\cdot\text{SMe})_4]^+$  fragment in compound **5** (for experiment see Figs. S21 and S22).

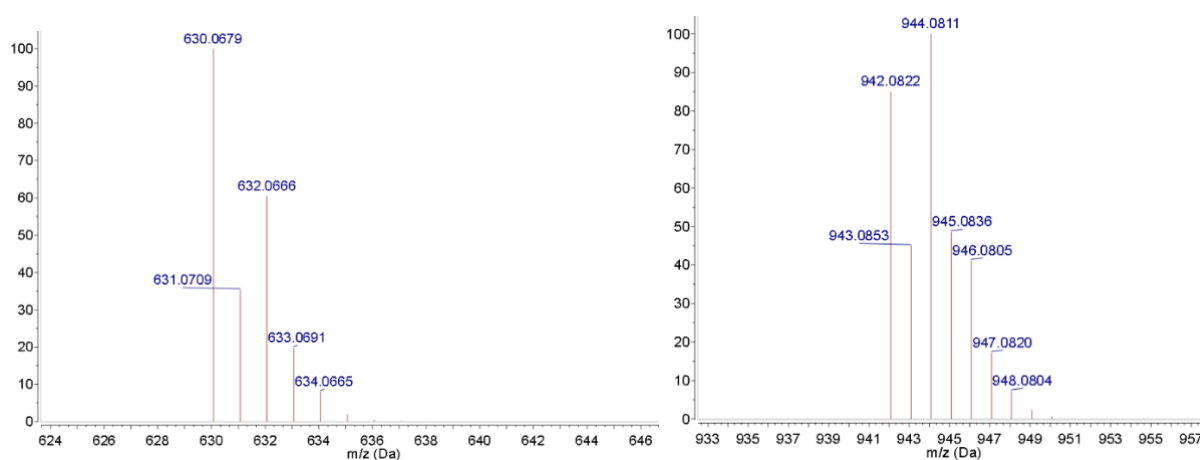

**Fig. S28** Calculated isotopic pattern of  $[\text{CuNa}(\text{L}\cdot\text{SMe})_2]^+$  (left) and  $[\text{Cu}_2(\text{L}\cdot\text{SMe})_3]^+$  (right) fragments in compound **5** (for experiment see Fig. S21).

**Table S7** Selected ESI-MS data of compounds **1–5**.

| Measured [Da]     | Calculated [Da] | Sum formula                                                                                                 | Composition                                                                  |
|-------------------|-----------------|-------------------------------------------------------------------------------------------------------------|------------------------------------------------------------------------------|
| 883.0308          | 883.0284        | C <sub>34</sub> CuGdH <sub>34</sub> N <sub>2</sub> O <sub>8</sub> S <sub>2</sub> <sup>+</sup>               | [CuGd(L·SMe) <sub>2</sub> (OOCMe) <sub>2</sub> ] <sup>+</sup> (in <b>1</b> ) |
| 1096.0931         | 1096.0898       | C <sub>47</sub> CuGdH <sub>45</sub> N <sub>3</sub> O <sub>8</sub> S <sub>3</sub> <sup>+</sup>               | [CuGd(L·SMe) <sub>3</sub> (OOCMe)] <sup>+</sup> (in <b>1</b> )               |
| 884.0309          | 884.0301        | C <sub>34</sub> CuH <sub>34</sub> N <sub>2</sub> O <sub>8</sub> S <sub>2</sub> Tb <sup>+</sup>              | [CuTb(L·SMe) <sub>2</sub> (OOCMe) <sub>2</sub> ] <sup>+</sup> (in <b>2</b> ) |
| 1097.0923         | 1097.0913       | C <sub>47</sub> CuH <sub>45</sub> N <sub>3</sub> O <sub>8</sub> S <sub>3</sub> Tb <sup>+</sup>              | [CuTb(L·SMe) <sub>3</sub> (OOCMe)] <sup>+</sup> (in <b>2</b> )               |
| 889.0593          | 889.0333        | C <sub>34</sub> CuDyH <sub>34</sub> N <sub>2</sub> O <sub>8</sub> S <sub>2</sub> <sup>+</sup>               | [CuDy(L·SMe) <sub>2</sub> (OOCMe) <sub>2</sub> ] <sup>+</sup> (in <b>3</b> ) |
| 1102.1266         | 1102.0947       | C <sub>47</sub> CuDyH <sub>45</sub> N <sub>3</sub> O <sub>8</sub> S <sub>3</sub> <sup>+</sup>               | [CuDy(L·SMe) <sub>3</sub> (OOCMe)] <sup>+</sup> (in <b>3</b> )               |
| 814.0120          | 814.0106        | C <sub>34</sub> CuH <sub>34</sub> N <sub>2</sub> O <sub>8</sub> S <sub>2</sub> Y <sup>+</sup>               | [CuY(L·SMe) <sub>2</sub> (OOCMe) <sub>2</sub> ] <sup>+</sup> (in <b>4</b> )  |
| 1027.0737         | 1027.0718       | C <sub>47</sub> CuH <sub>45</sub> N <sub>3</sub> O <sub>8</sub> S <sub>3</sub> Y <sup>+</sup>               | [CuY(L·SMe) <sub>3</sub> (OOCMe)] <sup>+</sup> (in <b>4</b> )                |
| 630.0687–630.0858 | 630.0679        | C <sub>30</sub> CuH <sub>28</sub> N <sub>2</sub> NaO <sub>4</sub> S <sub>2</sub> <sup>+</sup>               | [CuNa(L·SMe) <sub>2</sub> ] <sup>+</sup> (in <b>5</b> )                      |
| 1239.1440         | 1239.1459       | C <sub>60</sub> Cu <sub>2</sub> H <sub>56</sub> N <sub>4</sub> NaO <sub>8</sub> S <sub>4</sub> <sup>+</sup> | [Cu <sub>2</sub> Na(L·SMe) <sub>4</sub> ] <sup>+</sup> (in <b>5</b> )        |
| 944.0814–944.1097 | 944.0811        | C <sub>45</sub> Cu <sub>2</sub> H <sub>42</sub> N <sub>3</sub> O <sub>6</sub> S <sub>3</sub> <sup>+</sup>   | [Cu <sub>2</sub> (L·SMe) <sub>3</sub> ] <sup>+</sup> (in <b>5</b> )          |

## 8. TGA curves of compounds 1–5

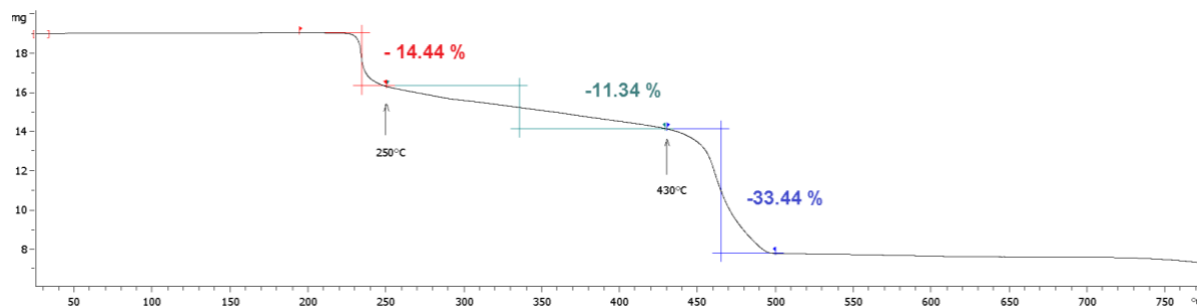

Fig. S29 TGA curve of compound 1 measured in dry air.

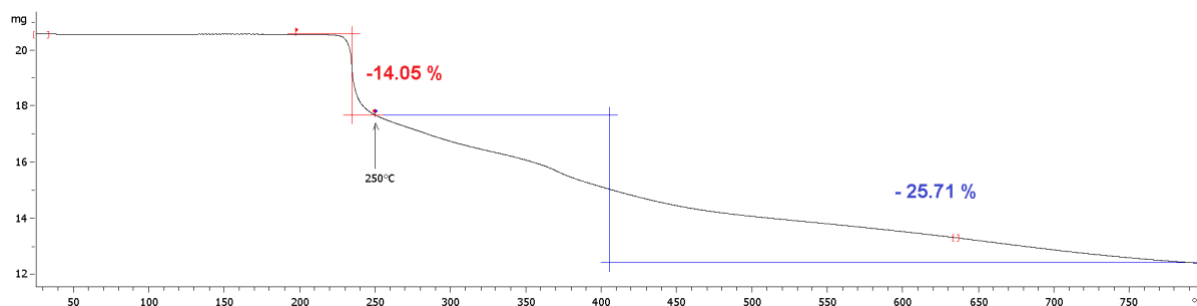

Fig. S30 TGA curve of compound 1 measured under nitrogen atmosphere.

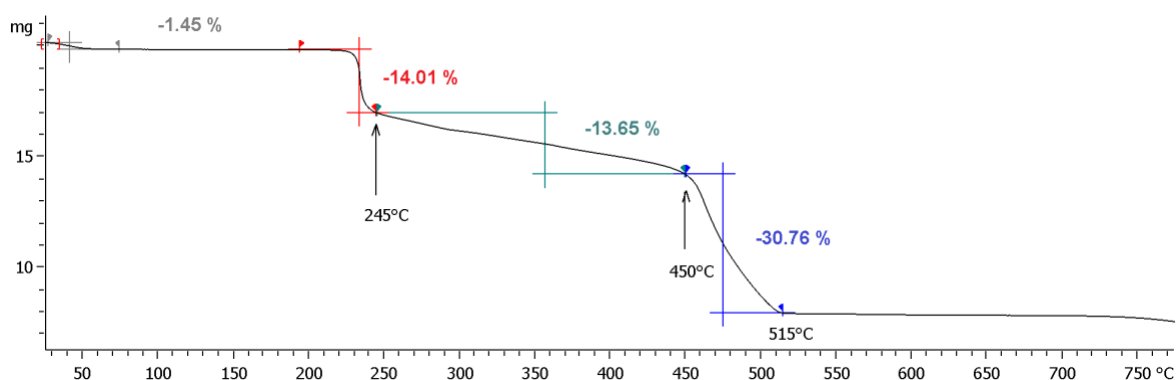

Fig. S31 TGA curve of compound 2 measured in dry air.

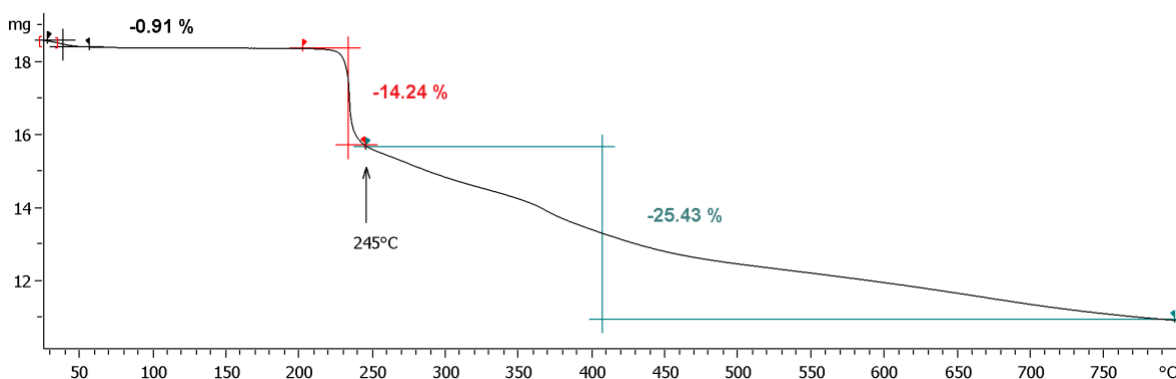

Fig. S32 TGA curve of compound 2 measured under nitrogen atmosphere.

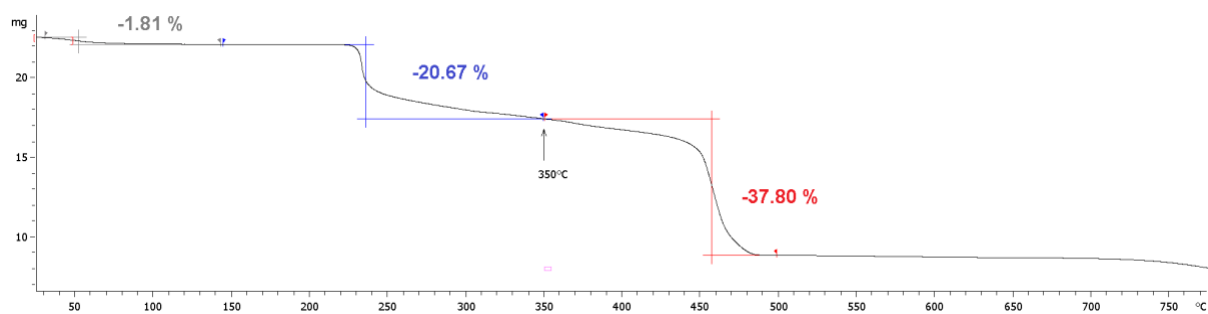

**Fig. S33** TGA curve of compound **3** measured in dry air.

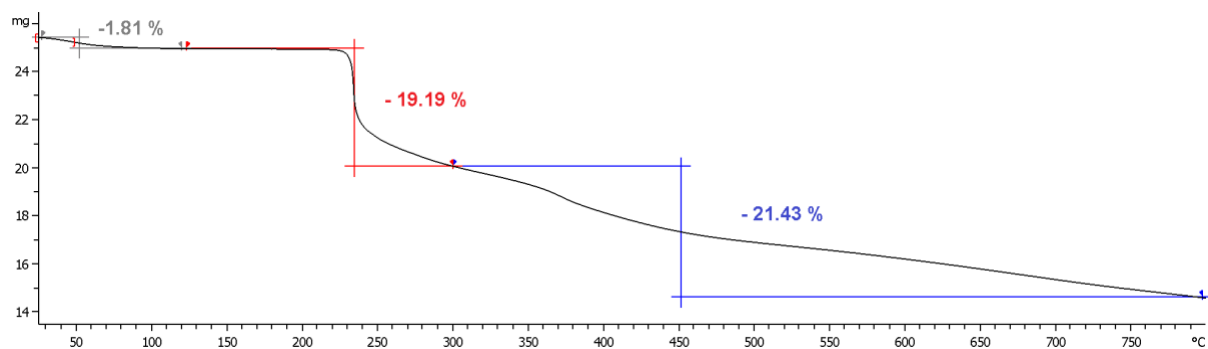

**Fig. S34** TGA curve of compound **3** measured under nitrogen atmosphere.

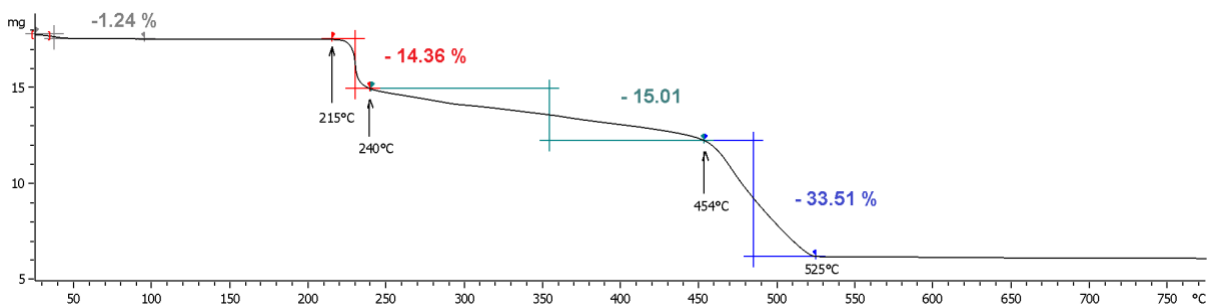

**Fig. S35** TGA curve of compound **4** measured in dry air.

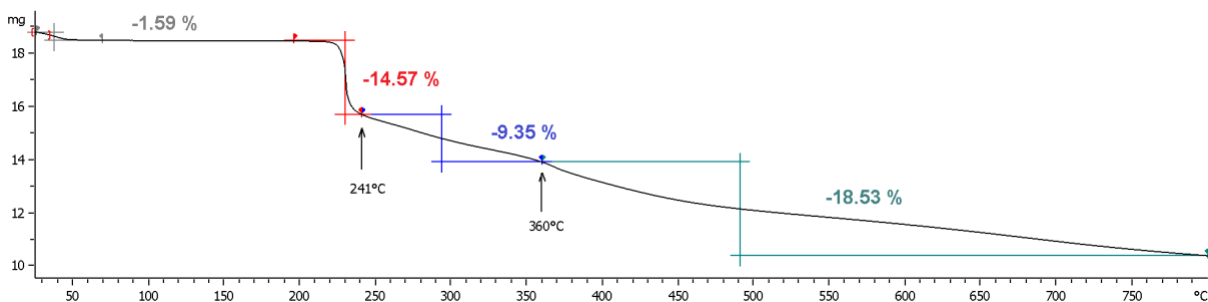

**Fig. S36** TGA curve of compound **4** measured under nitrogen atmosphere.



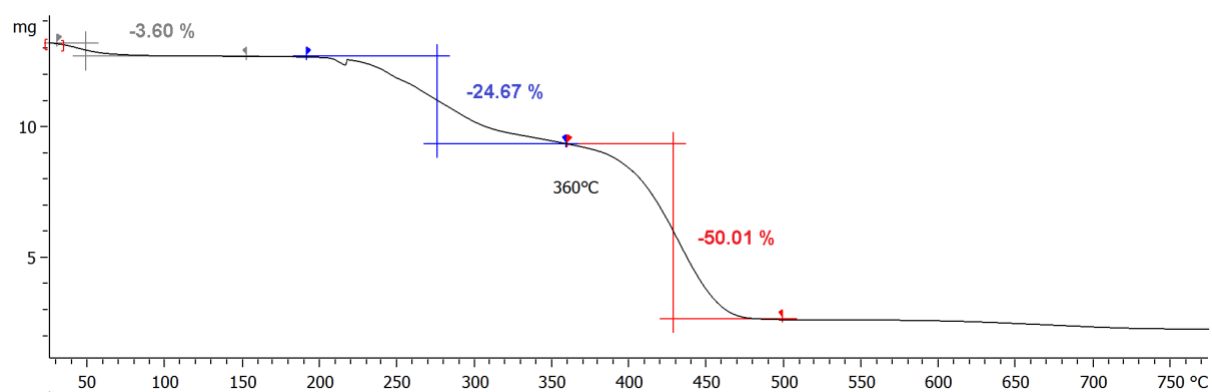

**Fig. S37** TGA curve of compound **5** measured in dry air.

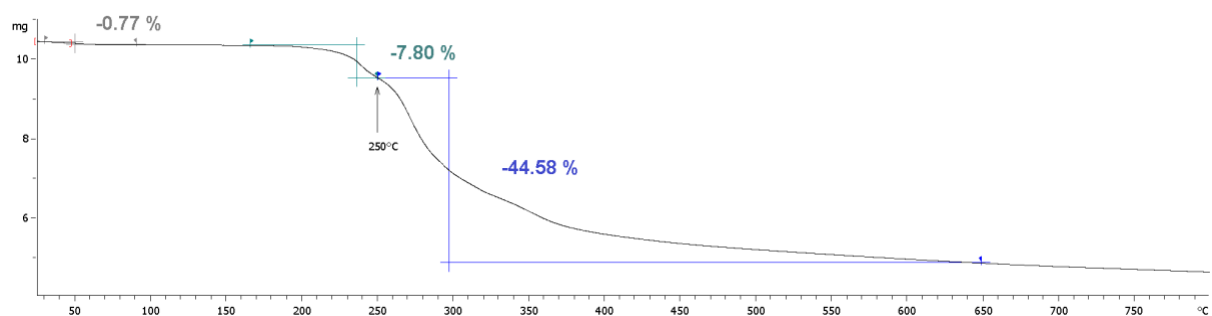

**Fig. S38** TGA curve of compound **5** measured under nitrogen atmosphere.

## 9. Details of large-area transport measurements

### *Sample preparation*

The Au and/or Ag substrates used in this work are made by mechanical Template Stripping (TS) as described elsewhere.<sup>[18]</sup> In our case, we deposited 100 nm of Au and/or Ag (99.99%) by thermal vacuum deposition onto a 3” Silicon wafer (with no adhesion layer). Using UV-curable Optical Adhesive (OA) Norland 61, 1 cm<sup>2</sup> glass chips were glued on the metal surfaces. The TS procedure provides ultra-flat smooth surfaces, which allows self-assembly process to achieve high yields of working junctions. All samples were made by incubation of freshly cleaved gold slides in ~0.1 mM solutions in methanol at room temperature for ~16 h.

### *Data acquisition*

Data were acquired in a home-built setup that is described in detail elsewhere.<sup>[19]</sup> Samples were taken out from solution, carefully rinsed with pure methanol and gently blown to dryness with nitrogen. Each SAM was then measured by placing a sharp tip of EGaIn in visual contact with the surface. Histograms of the values of  $J$  at each value of  $V$  were then fit to Gaussian distributions to calculate the average value of  $J$ . No data were discarded during the fitting procedure. Standard deviation of the fits was represented as error bars. Four samples were prepared for each compound and every sample was measured until 10 working junctions were obtained. Working junction is defined as a junction that does not exhibit either a no contact current or a short circuit current. The yields of working junctions for SAMs of each compound **1–4** are presented in Table S8. Total mean yield is 67%.

**Table S8** Data acquired for compounds **1–4**.

| Compound | Samples | Contacts | Working junctions | Yield |
|----------|---------|----------|-------------------|-------|
| <b>1</b> | 4       | 65       | 40                | 62%   |
| <b>2</b> | 4       | 42       | 40                | 95%   |
| <b>3</b> | 4       | 49       | 40                | 82%   |
| <b>4</b> | 4       | 82       | 40                | 49%   |

### *Transition voltages*

We calculate transition voltage by re-plotting each  $I/V$  trace in Fowler-Nordheim coordinates,  $\ln(I/V^2)$  versus  $1/V$ , and found the minimum from the numerical derivative. All values were then

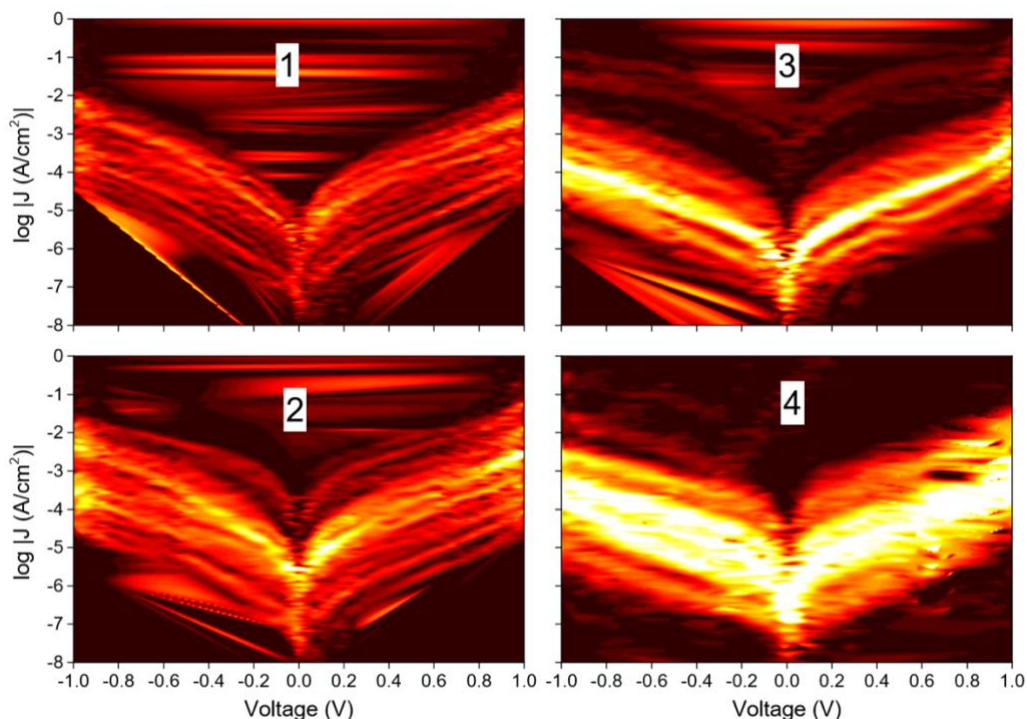

**Fig. S39** Raw  $\log|J|$  vs  $V$  data for complexes **1–4** presented in the form of heat maps. The heat maps are constructed such that a slice at a certain voltage step represents a histogram of  $\log|J|$  at this specific voltage. No data were discarded for the construction of heat maps. The straight lines above and below the v-shaped real data (for complexes **1–3**) are artifacts from the interpolation procedure.

plotted in a histogram to which a Gaussian distribution was fit to get a peak value and a standard deviation. We used Scientific Python to automate the entire process, providing only raw  $J/V$  data as an input. Figure S40 shows the peak values of Gaussian fits along with standard deviation as error bars for the four compounds **1–4**. All of them are positioned around  $\sim 0.3$  V with  $V_T$  of compound **4** being poorly defined.

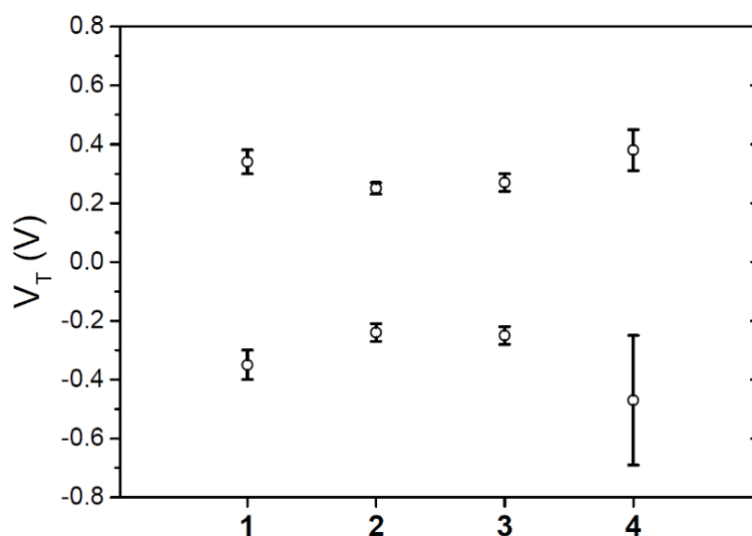

**Fig. 40** Average values of  $V_T$  of compounds **1–4** with standard deviation plotted as error bars. No apparent trend is observed and all values coalesce to  $\sim 0.3$  V.

### Conductance analysis

In order to determine the average conductivity ( $J_{avg}$ ) for compounds **1–4** we combined the values of  $J$  at  $-0.5\text{V}$  into a histogram and fit it with a Gaussian distribution (Fig. S41). The peak value was then compared to a series of alkanethiolates on  $\text{Ag}^{\text{TS}}$  (Fig. 7, main text).

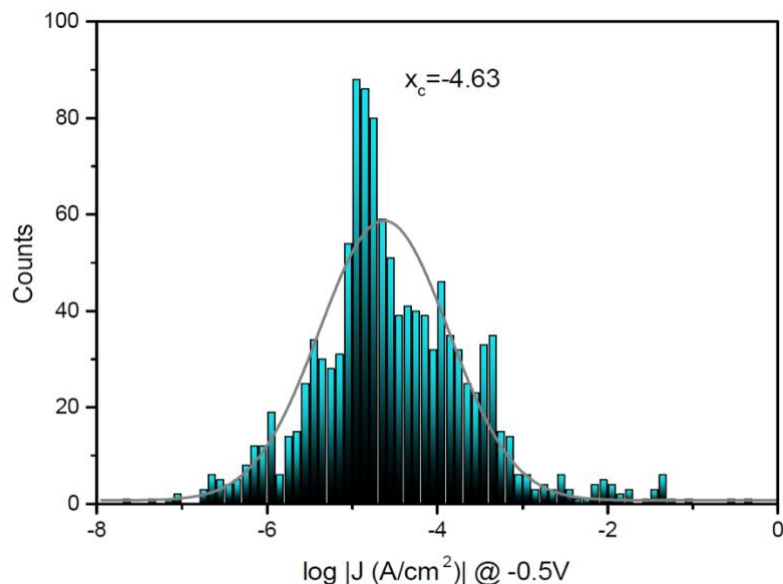

**Fig. S41** Combined histogram of  $\log |J|$  at  $-0.5\text{ V}$  for the compounds **1–4** with a Gaussian fit. The peak position corresponds to average conductivity  $J_{avg} = -4.63\text{ A/cm}^2$  at  $-0.5\text{ V}$ .

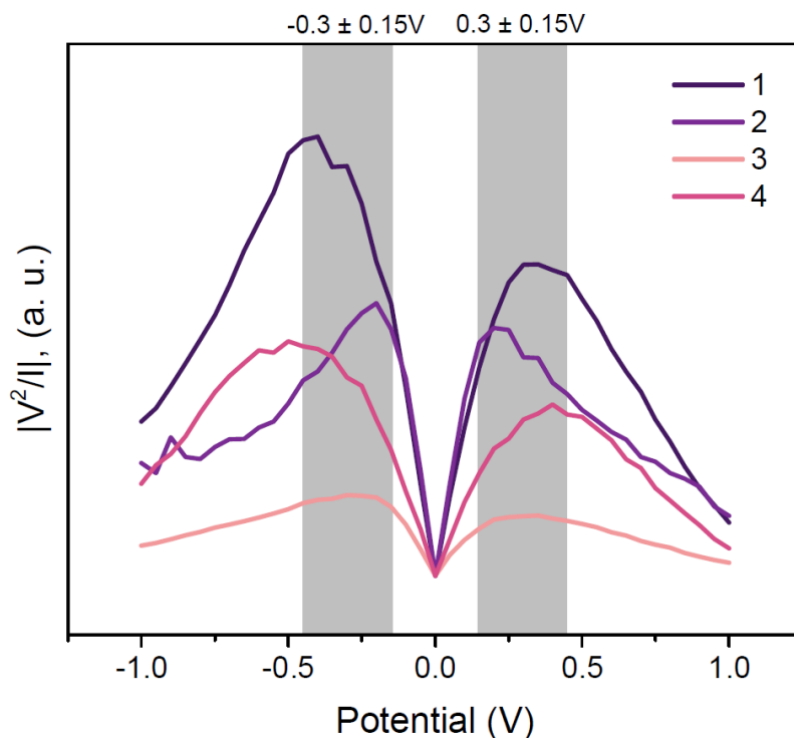

**Fig. S42** Transition voltage spectroscopy of complexes **1–4**. Visual representation of the average conductance (presented in Fig. 6, main text) replotted in  $|V^2/I|$  vs  $V$  coordinates. Here, peak values correspond to  $V_T$ . All values coalesce to  $\sim 0.3\text{ V}$ , with  $V_T$  of complex **4** being poorly defined, that is a broad distribution with big variance.

### STM measurements

The monolayers corresponding to compounds **1–4** were studied using scanning tunneling microscopy (STM). A similar method was applied to prepare SAMs of compounds **1–4** on commercial Au on mica (Au/mica). The Au/mica samples were immersed in methanolic solutions of **1–4** (0.1 mM) overnight inside the glove box where oxygen and water are limited in the ppm level. Then, they were rinsed with methanol and dried with a flow of N<sub>2</sub>. Imaging of the samples was performed using Picoscan software by a Molecular Imaging STM set-up under ambient conditions. Cutting Pt/Ir (80/20) tips were used to obtain constant current images at room temperature with a bias voltage applied to the sample. A fresh tip was used for every sample. The STM images are processed and analyzed using the software WSxM 4.0 Beta 9.0. Figure S43 illustrates the obtained STM images. No apparent packing structure can be determined from these images. Compounds **1–4** are homogeneously distributed on the gold surface and resemble a monolayer.

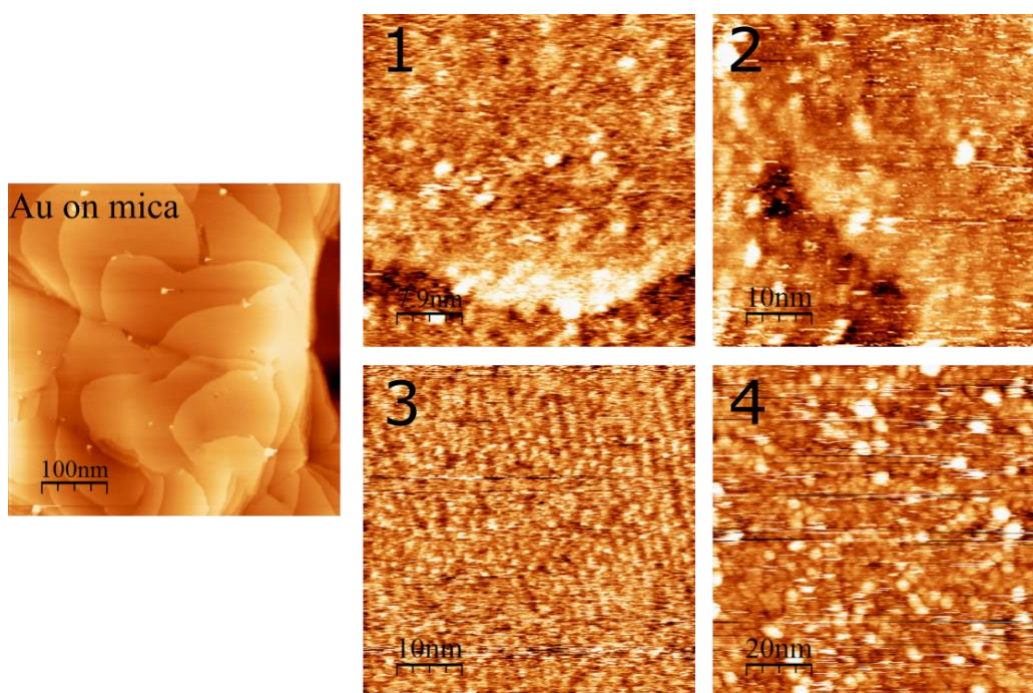

**Fig. S43** STM images of the SAMs of bare Au/mica and compounds **1–4** on Au/mica,  $I_t = 10$  pA,  $U_s = 0.8$  V, 512 pixel.

### Ellipsometry

The SAMs were characterized by ellipsometry. These measurements were acquired on freshly prepared samples in air on a V-Vase Rotating Analyzer equipped with a HS-190 monochromator ellipsometer and calculated via a two-layer model consisting of a bottom Au layer, for which optical constants were calculated from freshly prepared template stripped Au surfaces, and a Cauchy layer

with a chosen value of  $n = 1.5$  and  $k = 0$  at all wavelengths ( $A=1.5$ ,  $B=C=0$ ). The results are summarized in Table S9.<sup>[20]</sup>

**Table S9** Ellipsometric thickness (in nm) for the SAMs of compounds **1–4**. The average thickness is 1.291 nm.

| Compound | Measurement | Ellipsometric thickness |
|----------|-------------|-------------------------|
| <b>1</b> | 1           | $1.081 \pm 0.030$       |
|          | 2           | $1.085 \pm 0.030$       |
| <b>2</b> | 1           | $1.312 \pm 0.032$       |
|          | 2           | $1.208 \pm 0.033$       |
| <b>3</b> | 1           | $1.546 \pm 0.029$       |
|          | 2           | $1.566 \pm 0.032$       |
| <b>4</b> | 1           | $1.254 \pm 0.036$       |
|          | 2           | $1.274 \pm 0.037$       |

## 10. References

- 
- [1] Lueken, H. *Magnetochemie*, Teubner, Stuttgart, **1999**.
- [2] Speldrich, M.; Schilder, H.; Lueken, H.; Kögerler, P. A Computational Framework for Magnetic Polyoxometalates and Molecular Spin Structures: CONDON 2.0. *Isr. J. Chem.* **2011**, *51*, 215–227.
- [3] van Leusen, J.; Speldrich, M.; Schilder, H.; Kögerler, P. Comprehensive Insight into Molecular Magnetism via CONDON: Full vs. Effective Models. *Coord. Chem. Rev.* **2015**, *289–290*, 137–148.
- [4] Griffith, J. S. *The Theory of Transition Metal Ions*, Cambridge University Press, Cambridge, **1980**.
- [5] Ramade, I.; Kahn, O.; Jeannin, Y.; Robert, F. Design and Magnetic Properties of a Magnetically Isolated Gd<sup>III</sup>Cu<sup>II</sup> Pair. Crystal Structures of [Gd(hfa)<sub>3</sub>Cu(salen)], [Y(hfa)<sub>3</sub>Cu(salen)], [Gd(hfa)<sub>3</sub>Cu(salen)(Meim)], and [La(hfa)<sub>3</sub>(H<sub>2</sub>O)Cu(salen)] [hfa = Hexafluoroacetylacetonato, salen = *N,N'*-Ethylenebis(salicylideneaminato), Meim = 1-Methylimidazole]. *Inorg. Chem.* **1997**, *36*, 930–936.
- [6] Gleizes, A.; Julve, M.; Kuzmina, N.; Alikhanyan, A.; Lloret, F.; Malkerova, I.; Sanz, J. L.; Senocq, F. Heterobimetallic *d–f* Metal Complexes as Potential Single-Source Precursors for MOCVD: Structure and Thermodynamic Study of the Sublimation of [Ni(salen)Ln(hfa)<sub>3</sub>], Ln = Y, Gd. *Eur. J. Inorg. Chem.* **1998**, 1169–1174.
- [7] Cosquer, G.; Pointillart, F.; Le Guennic, B.; Le Gal, Y.; Golhen, S.; Cador, O.; Ouahab, L. 3d4f Heterobimetallic Dinuclear and Tetranuclear Complexes Involving Tetrathiafulvalene as Ligands: X-ray Structures and Magnetic and Photophysical Investigations. *Inorg. Chem.* **2012**, *51*, 8488–8501.
- [8] Zhang, P.; Zhang, L.; Lin, S.-Y.; Tang, J. Tetranuclear [MDy]<sub>2</sub> Compounds and Their Dinuclear [MDy] (M = Zn/Cu) Building Units: Their Assembly, Structures, and Magnetic Properties. *Inorg. Chem.* **2013**, *52*, 6595–6602.
- [9] Upadhyay, A.; Singh, S. K.; Das, C.; Mondol, R.; Langley, S. K.; Murray, K. S.; Rajaraman, G.; Shanmugam, M. Enhancing the Effective Energy Barrier of a Dy(III) SMM Using a Bridged Diamagnetic Zn(II) Ion. *Chem. Commun.* **2014**, *50*, 8838–8841.
- [10] Upadhyay, A.; Komatireddy, N.; Ghirri, A.; Tuna, F.; Langley, S. K.; Srivastava, A. K.; Sañudo, E. C.; Moubaraki, B.; Murray, K. S.; McInnes, E. J. L.; Affronte, M.; Shanmugam, M. Synthesis and Magnetothermal Properties of a Ferromagnetically Coupled Ni<sup>II</sup>–Gd<sup>III</sup>–Ni<sup>II</sup> Cluster. *Dalton Trans.* **2014**, *43*, 259–266.
- [11] Bluhm, M. E.; Ciesielski, M.; Görls, H.; Walter, O.; Döring, M. Complexes of Schiff Bases and Intermediates in the Copper-Catalyzed Oxidative Heterocyclization by Atmospheric Oxygen. *Inorg. Chem.* **2003**, *42*, 8878–8885.
- [12] Mukherjee, P.; Drew, M. G. B.; Figuerola, A.; Ghosh, A. Incorporation of a Sodium Ion Guest in the Host of Copper(II)-Schiff-Base Complexes: Structural Characterization and Magnetic Study. *Polyhedron* **2008**, *27*, 3343–3350.
- [13] Biswas, S.; Naiya, S.; Drew, M. G. B.; Estarellas, C.; Frontera, A.; Ghosh, A. Trinuclear and Tetranuclear Adduct Formation Between Sodium Perchlorate and Copper(II) Complexes of Salicylaldimine Type Ligands: Structural Characterization and Theoretical Investigation. *Inorg. Chim. Acta* **2011**, *366*, 219–226.

- 
- [14] Chakrabarty, P. P.; Biswas, D.; García-Granda, S.; Jana, A. D.; Saha, S. Sodium Ion Assisted Molecular Self-Assembly in a Class of Schiff-Base Copper(II) Complexes. *Polyhedron* **2012**, *35*, 108–115.
- [15] Maiti, M.; Sadhukhan, D.; Thakurta, S.; Sen, S.; Zangrando, E.; Butcher, R. J.; Deka, R. C.; Mitra, S. Pseudohalide-Controlled Assemblies of Copper–Schiff Base Complexes with an Encapsulated Sodium Ion: Synthesis, Crystal Structure, and Computational Studies. *Eur. J. Inorg. Chem.* **2013**, 527–536.
- [16] Biswas, A.; Mondal, S.; Mohanta, S. Syntheses, Characterizations, and Crystal Structures of 3d–s/d<sup>10</sup> Metal Complexes Derived from Two Compartmental Schiff Base Ligands. *J. Coord. Chem.* **2013**, *66*, 152–170.
- [17] Fellah, F. Z. C.; Costes, J.-P.; Duhayon, C.; Vendier, L. Use of Azido Ligands in the Syntheses of Different Homo- and Hetero-Complexes. *Polyhedron* **2016**, *111*, 101–108.
- [18] Weiss, E. A.; Kaufman, G. K.; Kriebel, J. K.; Li, Z.; Schalek, R.; Whitesides, G. M. Si/SiO<sub>2</sub>-Templated Formation of Ultraflat Metal Surfaces on Glass, Polymer, and Solder Supports: Their Use as Substrates for Self-Assembled Monolayers. *Langmuir* **2007**, *23*, 9686–9694.
- [19] Fracasso, D.; Valkenier, H.; Hummelen, J. C.; Solomon, G. C.; Chiechi, R. C. Evidence for Quantum Interference in SAMs of Arylethynylene Thiolates in Tunneling Junctions with Eutectic Ga–In (EGaIn) Top-Contacts. *J. Am. Chem. Soc.* **2011**, *133*, 9556–9563.
- [20] Valkenier, H.; Huisman, E. H.; van Hal, P. A.; de Leeuw, D. M.; Chiechi, R. C.; Hummelen, J. C. Formation of High-Quality Self-Assembled Monolayers of Conjugated Dithiols on Gold: Base Matters. *J. Am. Chem. Soc.* **2011**, *133*, 4930–4939.
